# Supplementary material for: Labour room violence in Uttar Pradesh, India: evidence from longitudinal study of pregnancy and childbirth
Source: PubMed Central journal article supplement — BMJ Open. 2019 Jul 1;9(7):e028688. doi: 10.1136/bmjopen-2018-028688 (PMC6609138; doi:10.1136/bmjopen-2018-028688), 2019-07-01
Supplement: bmjopen-2018-028688.draft_revisions.pdf [file bmjopen-2018-028688.draft_revisions.pdf]

# BMJ Open

BMJ Open is committed to open peer review. As part of this commitment we make the peer review history of every article we publish publicly available.

When an article is published we post the peer reviewers' comments and the authors' responses online. We also post the versions of the paper that were used during peer review. These are the versions that the peer review comments apply to.

The versions of the paper that follow are the versions that were submitted during the peer review process. They are not the versions of record or the final published versions. They should not be cited or distributed as the published version of this manuscript.

BMJ Open is an open access journal and the full, final, typeset and author-corrected version of record of the manuscript is available on our site with no access controls, subscription charges or pay-per-view fees (<http://bmjopen.bmj.com>).

If you have any questions on BMJ Open's open peer review process please email [info.bmjopen@bmj.com](mailto:info.bmjopen@bmj.com)

# BMJ Open

## Labor Room Violence in India: Levels and Determinants

|                               |                                                                                                                                                                                                                                                                                                                                                                                                                                                                                                                         |
|-------------------------------|-------------------------------------------------------------------------------------------------------------------------------------------------------------------------------------------------------------------------------------------------------------------------------------------------------------------------------------------------------------------------------------------------------------------------------------------------------------------------------------------------------------------------|
| Journal:                      | <i>BMJ Open</i>                                                                                                                                                                                                                                                                                                                                                                                                                                                                                                         |
| Manuscript ID                 | bmjopen-2018-028688                                                                                                                                                                                                                                                                                                                                                                                                                                                                                                     |
| Article Type:                 | Research                                                                                                                                                                                                                                                                                                                                                                                                                                                                                                                |
| Date Submitted by the Author: | 20-Dec-2018                                                                                                                                                                                                                                                                                                                                                                                                                                                                                                             |
| Complete List of Authors:     | Goli, Srinivas; Jawaharlal Nehru University, Demography<br>Ganguly, Dibyasree; Jawaharlal Nehru University, Centre for Study of Regional Development<br>Chakravorty, Swastika; Jawaharlal Nehru University, Center for study of Regional Development<br>Siddiqui, Mohammad; Jawaharlal Nehru University, School of social sciences<br>Rammohan, Anu; The University of Western Australia, Department of Economics<br>Acharya, Sanghamitra ; Jawaharlal Nehru University, Centre of Social Medicine and Community Health |
| Keywords:                     | OBSTETRICS, Quality in health care < HEALTH SERVICES ADMINISTRATION & MANAGEMENT, Health & safety < HEALTH SERVICES ADMINISTRATION & MANAGEMENT, PUBLIC HEALTH                                                                                                                                                                                                                                                                                                                                                          |
|                               |                                                                                                                                                                                                                                                                                                                                                                                                                                                                                                                         |

SCHOLARONE™  
Manuscripts

## Title: Labor Room Violence in India: Levels and Determinants

### **First Author**

Srinivas Goli [Corresponding Author]  
Assistant Professor  
Centre for the Study of Regional Development  
School of Social Sciences (SSS)  
Jawaharlal Nehru University (JNU), Delhi-110067, India  
Phone: +91 7042181232  
Email: [sirispaks2u@gmail.com](mailto:sirispaks2u@gmail.com)  
ORCID: <http://orcid.org/0000-0002-8481-484X>

### **Second Author**

Dibyasree Ganguly  
Doctoral Student, Population Studies  
Centre for the Study of Regional Development  
School of Social Sciences (SSS)  
Jawaharlal Nehru University (JNU), Delhi-110067, India  
Phone No: 91+9971435497  
Email: [dibyasreeganguly@gmail.com](mailto:dibyasreeganguly@gmail.com)  
ORCID: [orcid.org/0000-0001-5677-6316](http://orcid.org/0000-0001-5677-6316)

### **Third Author**

Swastika Chakravorty  
Doctoral Student, Population Studies  
Centre for the Study of Regional Development  
School of Social Sciences (SSS)  
Jawaharlal Nehru University (JNU), Delhi-110067, India  
Phone No: 91+8447784208  
Email: [swa.cha1992@gmail.com](mailto:swa.cha1992@gmail.com)  
ORCID: [orcid.org/0000-0003-3681-9950](http://orcid.org/0000-0003-3681-9950)

### **Fourth Author**

Mohammad Zahid Siddiqui  
Doctoral Student, Population Studies  
Centre for the Study of Regional Development  
School of Social Sciences (SSS)  
Jawaharlal Nehru University (JNU), Delhi-110067, India  
Phone No: 91+8800369953  
Email: [say2zahid.s@gmail.com](mailto:say2zahid.s@gmail.com)

### **Fifth Author**

Anu Rammohan, PhD  
Professor, Department of Economics,  
The University of Western Australia (M251),  
35 Stirling Highway, Crawley WA- 6009, Australia  
Phone No: 6488 5656  
Email: [anu.ammohan@uwa.edu.au](mailto:anu.ammohan@uwa.edu.au)

### **Sixth Author**

Sanghamitra Sheel Acharya, Ph.D  
Professor, Centre of Social Medicine and Community Health  
Jawaharlal Nehru University (JNU)-110067, India  
Phone No: 011-26704433 / 20  
Email: [sanghmitra.acharya@gmail.com](mailto:sanghmitra.acharya@gmail.com)

## Abstract

**Objectives** The major objective of this study was to investigate the prevalence of labor room violence [LRV] (one of the forms of obstetric violence) faced by the women during the time of delivery in Uttar Pradesh [UP] (the largest populous state of India which is also considered to be a microcosm of India). Further, this study also analyses the association between prevalence of obstetric violence and socio-economic characteristics of the respondents.

**Design** Longitudinal study consisting of three waves to collect pregnancy related information from women in early stages of pregnancy to post-delivery period.

**Settings** Urban and rural areas of UP, India.

**Participants** Sample of 504 pregnant women was selected from the Integrated Child Development Scheme (ICDS) Register of pregnant women.

**Outcome** We aimed to assess the levels and determinants of LRV using data collected from 504 pregnant women in a longitudinal survey conducted in UP, India. The dataset comprised of three-waves of survey from the inception of pregnancy to child-birth and postnatal-care. Logistic Regression model has been used to assess the association between prevalence of LRV faced by the women at the time of delivery and their background characteristics.

**Result** About 15.12% of women are facing LRV in UP, India. Results from logistic regression model (Odds Ratio [OR]) show that LRV is higher among Muslim women (OR = 1.8, 95% CI [Confidence Interval] 0.7-4.3) relative to Hindu women (OR = 1). The prevalence of LRV is higher among lower castes relative to General category, and is higher among those women who have no mass media exposure (OR=4.7, 95% CI 1.7-12.8) compared to those who have (OR=1).

**Conclusion** In comparison with global evidence, the level of LRV in India is high. Women from socially disadvantaged communities are facing higher LRV than their counterparts.

**Keywords:** Labor room violence, women, institutional delivery, quality of health care.

**Word Count: 2269**

## Article Summary

### Strengths and limitations of this study

- For the first time, the study measures LRV experienced by women in health facilities in India and factors associated with it.
- In comparison with global evidence, the level of LRV in India is high. Women from socially disadvantaged communities are facing higher LRV than their counterparts.
- The estimated LRV in the survey setting may be lower than actual because of under reporting due to lack of awareness about forms of obstetric violence.
- The smaller sample size prevents us from presenting LRV estimates at the greater disaggregated levels.
- However, in the absence of information on LRV in existing large scale surveys, the contribution of this study is significant.

### Introduction

One of the major targets of the Sustainable Development Goals (SDGs) is to reduce maternal mortality to 70 per 100,000 live births by 2030<sup>1</sup>. Significant strides have been made in increasing life expectancy and reducing some of the common killers associated with child and maternal mortality, but working towards achieving the target of less than 70 maternal deaths per 100,000 live births by 2030 would require significant improvements in the quality of delivery care. Skilled birth attendance (SBA) has been a cornerstone of international efforts to reduce maternal mortality and is often measured by the indicators such as institutional deliveries or deliveries with skilled birth attendance. Recently, the United Nations Educational, Scientific and Cultural Organisation (UNESCO), in its Universal Declaration of Bioethics and Human Rights, declared that “health does not depend solely on scientific and technological research developments, but also on psychosocial and cultural factors.”<sup>2</sup> Thus, a tacit effort has been made world-wide (including in India) to encourage institutional deliveries and SBA to ensure good quality of care during child-birth. Yet despite this, India still continues to contribute disproportionately to the global estimates of maternal morbidity and mortality. Globally, about 800 women die every day of preventable causes related to pregnancy and childbirth, 20 per cent of these women are from India.<sup>3</sup> The figures for institutional deliveries (78.9) and skilled birth attendance deliveries (81.4) in 2015-16 are also much lower than 100 percent as envisioned by SDGs. India has also failed to meet the

1  
2  
3 MDG targets related to institutional deliveries and SBA by 2015. There is increasing  
4 attention and wide recognition that many women are deterred from facility-based delivery  
5 because the intrapartum care provided in the facilities does not satisfy the interpersonal and  
6 emotional aspects of this biosocial event. Others believe that the differences in quality of  
7 intrapartum care which arise from a broader aspect social, cultural and economic  
8 discrimination and exclusion, are important for maternal health outcomes.<sup>4-5</sup>  
9

10  
11  
12  
13  
14  
15 Poor quality care includes disrespectful and abusive care, patient-blaming, purposeful  
16 neglect, verbal or physical abuse, disregard for traditional beliefs, and the non-use of  
17 Indigenous languages for patient communication. This type of behavior has been classified as  
18 Obstetric/ Labour Room Violence (LRV) <sup>6</sup>. Worldwide, many women experience  
19 disrespectful and abusive treatment during childbirth in facilities, although evidence is  
20 limited in developing countries like India. Further, according to WHO reports “such conduct  
21 not only violates the rights of women to respectful care, but can also threaten their rights to  
22 life, health, bodily integrity, and freedom from discrimination”.<sup>6</sup> This statement invites  
23 greater action, dialogue, research and advocacy on this important public health and human  
24 rights problem.  
25  
26  
27  
28  
29  
30  
31  
32  
33

### 34 **LRV: Global Evidence**

35  
36 Prevalence of obstetric violence on women is a shockingly common phenomena for  
37 developing countries (>70% in Tanzania, Brazil). Increasingly, a number of studies on  
38 obstetric violence have focused widely on defining the term obstetric violence and the  
39 mistreatment associated with it. This involves determining forms of obstetric violence,  
40 measurement of different forms of obstetric violence, identifying challenges to maternity  
41 care, the emergent of laws to combat this problem and identifying systematic failures at the  
42 health system level and providing health facility. <sup>7-15</sup> LRV is often associated with adverse  
43 effects on pregnancy outcome. For instance, LRV may lead to issues such as maternal post-  
44 partum depression and post-traumatic stress disorders, particularly if the abuse is extreme. It  
45 is the most cited reason in Latin American countries for women to not return to health  
46 facilities for subsequent pregnancies, which consequently leads to an increase in maternal and  
47 child mortality and morbidities. A body of research mainly concentrated in Latin America  
48 and Europe specifically discusses obstetric violence, its determinants and forms.<sup>7 16-20</sup>  
49 However, it is critical to generate data relating to disrespectful and abusive care practices  
50  
51  
52  
53  
54  
55  
56  
57  
58  
59  
60

1  
2  
3 over the pregnancy period and at the time of childbirth, particularly in developing countries  
4 such as India.  
5  
6  
7

## 8 **Methods**

### 9 **Study design and setting**

10 This study is based on a unique survey conducted under the Project ‘Understanding  
11 pregnancy nutrition and health care among women in rural and urban slums of Uttar Pradesh:  
12 A longitudinal study’. Data was collected during the period June 2016 to July 2016 from a  
13 systematically selected sample of 504 pregnant women from the Integrated Child  
14 Development Scheme (ICDS) Register of pregnant women in selected villages. The study  
15 adopted a two-stage sampling design for both urban and rural areas. In the first stage, PSUs  
16 were selected from the chosen blocks in two districts of survey based on the number of  
17 pregnant women in the villages, where importance was given to villages with the largest  
18 number of pregnant women from diverse social groups. In the identified village, pregnant  
19 women were selected from the register, maintained by the Accredited Social Health Activist  
20 (ASHA) (the community health workers instituted by the Government of India’s Ministry of  
21 Health and Family Welfare as part of the National Rural Health Mission (NRHM) and  
22 Anganwadi workers (AWWs) - appointed as functionaries to support health, education and  
23 rural development under ICDS of Ministry of Women and Child Development).  
24  
25  
26  
27  
28  
29  
30  
31  
32  
33  
34  
35

36 The sample size (n=504) is calculated using parameters such as the total number of  
37 pregnancies (n) obtained in each district through Annual Health Survey (2014) and Z values  
38 for getting the estimates representative at 95% confidence interval and design effect at 2%.  
39 The sample is self-weighted where each woman has the equal chance of getting selected. This  
40 study used the information from the first and third wave of the above-mentioned longitudinal  
41 survey. We used the socio-economic and demographic characteristics of women collected in  
42 the first wave and LRV information from the third wave which was conducted after child  
43 birth for all 504 women.  
44  
45  
46  
47  
48  
49  
50

### 51 **Definitions**

52 The definition and coding of both outcome and predictor variables are given in appendix  
53 table 1.  
54  
55

### 56 **Data analysis**

The interview schedule comprised of structured questions in both in Hindi (local language) and English for the purpose of data collection. The respondents were asked the following question regarding labor room violence- “At the time of delivery, have the doctor/nurse/other health workers/staff of the hospital shouted/abused/hit you?” We have used bivariate tables to analyse the prevalence of LRV with socio-economic characteristics of the respondents. Further, logistic regression models were performed to assess the association between prevalence of LRV faced by women at the time of delivery and their background characteristics, which includes place of residence, religion, caste, education of the mother, age of the mother, partner’s occupation, any mass media exposure and wealth quintiles. The statistical analyses have been performed in STATA-14.0 software.

#### Patient and public involvement

No patients were involved in the research design, and no patients were directly involved in the study.

## Results

### Prevalence

Despite the known under-reporting of violence against women in India, about 15.12% of women reported LRV in our sample (Table 1).

**Table 1: Bivariate analysis: Factors associated with labour room violence.**

| Background Characteristics     | Labour Room Violence Prevalence | Chi-Square | 95% Confidence Interval |                  | No of Samples |
|--------------------------------|---------------------------------|------------|-------------------------|------------------|---------------|
|                                |                                 |            | Lower Limit (LL)        | Upper Limit (UL) | n             |
| <b>Place of Residence</b>      |                                 |            |                         |                  |               |
| Rural                          | 15.87                           | 0.3779     | 11.29                   | 21.86            | 344           |
| Urban                          | 19.11                           |            | 11.28                   | 30.53            | 160           |
| <b>Religion</b>                |                                 |            |                         |                  |               |
| Hindu                          | 16.23                           | 0.1341     | 11.62                   | 22.22            | 363           |
| Islam                          | 18.18                           |            | 10.47                   | 29.70            | 141           |
| <b>Caste</b>                   |                                 |            |                         |                  |               |
| SC/ST                          | 20.62                           | 1.8627     | 13.60                   | 29.99            | 190           |
| OBC                            | 15.18                           |            | 9.58                    | 23.21            | 227           |
| General                        | 12.50                           |            | 5.56                    | 25.76            | 87            |
| <b>Education of the Mother</b> |                                 |            |                         |                  |               |
| No Education                   | 20.0                            | 1.1504     | 12.87                   | 29.74            | 183           |
| 1-8 Years of Schooling         | 15.6                            |            | 9.85                    | 23.81            | 209           |
| Above Secondary                | 13.79                           |            | 6.90                    | 25.67            | 112           |
| <b>Age of the Mother</b>       |                                 |            |                         |                  |               |



|                                |       |          |       |       |     |
|--------------------------------|-------|----------|-------|-------|-----|
| 20 and below                   | 12.0  |          | 3.60  | 33.27 | 69  |
| 21-29                          | 17.62 | 0.5610   | 12.83 | 23.71 | 368 |
| 30 and Above                   | 15.38 |          | 6.82  | 31.12 | 67  |
| <b>Partner's occupation</b>    |       |          |       |       |     |
| Primary/Secondary              | 20.12 | 4.0636*  | 14.69 | 26.91 | 330 |
| Tertiary/Quaternary            | 10.23 |          | 5.34  | 18.71 | 174 |
| <b>Any Mass Media Exposure</b> |       |          |       |       |     |
| Yes                            | 12.72 | 6.1235** | 8.49  | 18.63 | 330 |
| No                             | 25.0  |          | 16.76 | 35.56 | 174 |
| <b>Wealth Quintiles</b>        |       |          |       |       |     |
| Poor                           | 16.88 |          | 9.94  | 27.21 | 168 |
| Middle                         | 16.84 | 0.0063   | 10.49 | 25.93 | 168 |
| Rich                           | 16.47 |          | 9.90  | 26.14 | 168 |

The prevalence of LRV is more pronounced in urban areas (19%) as relative to rural (16%). Similarly, the prevalence of LRV is more among Muslim (18%) as compared to Hindu (16%) women. Further, there is significant variation in prevalence of LRV among different caste groups i.e., Scheduled Castes (SCs) (20.6 %), OBC (15.2 %) and general category (12.5 %). The educational status of the mother also plays a significant role in determining the prevalence of LRV. Prevalence of LRV is higher for those whose mothers with no education (20%) compared to those whose mothers with few years of schooling. Furthermore, the variable partner's occupation also showed some variation in the prevalence of LRV. Specifically, LRV is more common among women whose husband is employed in Primary/Secondary activities (20.1%) compared to those involved in Tertiary activities (10.2 %). The wealth gradient is also important in assessing the prevalence of LRV. The most significant predictor of LRV is mass media exposure, with women who have any mass media exposure facing less violence (12.7%) as compared to women who have no mass media exposure (25%).

### Correlates

Logistic regression model (Table 2) shows that the variables- religion, caste, partner's occupation and mass media exposure are statistically significant and associated with the prevalence of LRV faced by women, after controlling for other confounders.

**Table 2: Logistic Regression estimates: Factors affecting labor room violence**

|                    | Odds Ratio | 95% Confidence Interval |    |
|--------------------|------------|-------------------------|----|
| Place of Residence |            | LL                      | UL |
| Urban              | 1          |                         |    |

|                                |          |       |        |
|--------------------------------|----------|-------|--------|
| Rural                          | 1.126    | 0.464 | 2.732  |
| <b>Religion</b>                |          |       |        |
| Hindu                          | 1        |       |        |
| Islam                          | 1.753*   | 0.722 | 4.255  |
| <b>Caste</b>                   |          |       |        |
| SC/ST                          | 1        |       |        |
| OBC                            | 0.619    | 0.262 | 1.462  |
| General                        | 0.473*   | 0.149 | 1.504  |
| <b>Education of the Mother</b> |          |       |        |
| No Education                   | 1        |       |        |
| 1-8 Years of Schooling         | 0.817    | 0.358 | 1.866  |
| Above Secondary                | 0.661    | 0.217 | 2.016  |
| <b>Age of the Mother</b>       |          |       |        |
| 20 and below                   | 1        |       |        |
| 21-29                          | 1.303    | 0.345 | 4.923  |
| 30 and Above                   | 0.970    | 0.197 | 4.782  |
| <b>Partner's occupation</b>    |          |       |        |
| Primary/Secondary              | 1        |       |        |
| Tertiary/Quaternary            | 0.402**  | 0.169 | 0.959  |
| <b>Any Mass Media Exposure</b> |          |       |        |
| Yes                            | 1        |       |        |
| No                             | 4.688*** | 1.713 | 12.831 |
| <b>Wealth Quintiles</b>        |          |       |        |
| Poor                           | 1        |       |        |
| Middle                         | 0.923    | 0.356 | 2.395  |
| Rich                           | 0.654    | 0.165 | 2.598  |

Note: Significance levels  $p < 0.05^*$ ,  $p < 0.01^{**}$ ,  $p < 0.001^{***}$

The odds of the occurrence of LRV is higher among Muslim women (Odds Ratio [OR] = 1.8, 95% CI [Confidence Interval] 0.7-4.3) relative to Hindu women (OR = 1). Among social groups, with reference to SCs (OR = 1), the odds of occurrence of violence faced by women is half among General category (OR = 0.5, 95% CI 0.1-1.5) and Other Backward Class (OBC) (OR = 0.6, 95% CI 0.3-1.5). In terms of partner's occupation, the odds of violence is less than half for women those partners were engaged in Tertiary activities (OR = 0.4, 95% CI 0.2-1) in comparison to Primary/Secondary activities (OR = 1). The occurrence of violence for the women those who have no mass media exposure (OR = 4.7, 95% CI 1.7-12.8) is about five times higher than those who have mass media exposure (OR = 1).

## Discussion

### Main Findings of this study

1  
2  
3 Given the context of the WHO pledge, that every woman has the right to the highest  
4 attainable standard of health which also includes the right to dignified, respectful health care.  
5 This paper, for the first time, empirically reports the occurrence of LRV and its  
6 socioeconomic correlates in India. The findings are important in the Indian context where  
7 health care delivery is dominated by the social hierarchies, and disadvantaged communities  
8 struggle to have a place in the health system and receive appropriate health care with dignity.  
9 Therefore, the findings of this study underpin the need to explore more on the issue of LRV  
10 with more in-depth and large scale studies. Despite significant under-reporting of violence in  
11 India, the estimate of LRV in this study is high and varies according to the socio-economic  
12 characteristics of the female respondent. Although, caste, religion, place of residence and  
13 partner's occupation emerged as significant factors associated with LRV; it is the exposure to  
14 mass media which shows the highest disparity in the occurrence of LRV. Thus, it particularly  
15 highlights the importance of awareness and knowledge about reproductive rights and  
16 entitlements of women in the health system. This can play significant role in determining the  
17 rate of LRV.  
18  
19  
20  
21  
22  
23  
24  
25  
26  
27  
28  
29

### 30 **Limitations of the study**

31  
32 Although the results of the survey indicate a high prevalence of LRV relative to studies from  
33 other developed countries<sup>7</sup>, but this study suffers from the issue of under-reporting due to  
34 lack of awareness about forms and nature of obstetric violence in the survey setting. Further,  
35 as with other micro studies, the study suffers from the short-coming of small sample size.  
36 However, in the absence of information on LRV in existing large scale surveys, the  
37 contribution of this study is significant.  
38  
39  
40  
41  
42  
43

### 44 **What is already known on this topic**

45  
46 In developing countries like India where maternal and child health indicators are far from  
47 satisfactory with poor medical and public health ethics in health care delivery system, the  
48 high prevalence of LRV raises an important policy question. To date the major concern for  
49 policy makers has been to increase the demand for health care services; so less attention is  
50 paid to the supply side barriers including the quality of health care services and related ethical  
51 standards. Due to the lack of availability of data, in-depth studies on LRV are absent for  
52 India.  
53  
54  
55  
56  
57  
58  
59  
60

1  
2  
3 In India, given the hierarchal nature of the society, it is imperative to study the access to  
4 health facilities and women's experience of receiving health care with dignity within a socio-  
5 economic framework. Studies based on experiences of Latin American women of Indigenous  
6 origin insist that women from poor, indigenous or socially backward classes receive "triple  
7 discrimination" i.e., by being female, being an ethnic minority and of lower socio-economic  
8 status.<sup>19</sup> Even in egalitarian European societies, women facing economic hardships and  
9 negative life events with the least social support have higher chance of experiencing LRV  
10 than their counterparts.<sup>21, 22</sup>  
11  
12  
13  
14  
15  
16

### 17 **What this study adds**

18  
19  
20 Although obstetric violence on women has received increasing global attention, developing  
21 countries have yet to address deficiencies in this area. The Government of India has already  
22 implemented several policies and interventions aimed towards providing adequate maternal  
23 health care services to all. The quality of maternal health care services is one of the major  
24 components integral to the improvement of maternal and child health, a long neglected area  
25 for policy-makers. With the emergence of various government interventions, the number of  
26 service providers has increased, but assuring quality and dignity in health care delivery  
27 remains a major concern. However, contemporary studies in India <sup>23-26</sup> with regards to  
28 maternal health care are mainly based on large population-level datasets focusing on  
29 availability and accessibility of maternal health care services. However, there is a research  
30 gap in the assessment of quality of those services and evaluating the nature of treatment  
31 provided by the health care workers, which is critically needed to improve public health care  
32 delivery system. Given this context, our study fills a critical knowledge gap by providing  
33 robust quantitative evidence on LRV experienced by pregnant women at health facilities.  
34 Issues such as LRV raise concerns not only on medical or hospital ethical standards in India  
35 but also on the violation of the reproductive rights of women.  
36  
37  
38  
39  
40  
41  
42  
43  
44  
45  
46  
47  
48

### 49 **Conclusions**

50  
51 In comparison to global evidence, the level of LRV in India is high. Women from socially  
52 disadvantaged communities are facing higher LRV than their counterparts. For any further  
53 progress in pregnancy outcomes in India, policy makers should focus not only on the  
54 availability and accessibility of services, but also on ensuring quality of care and dignity of  
55 the receivers. Countries such as India must improve its ethical standards in health care  
56  
57  
58  
59  
60

1  
2  
3 delivery where people from all sections of society, especially those from marginalised  
4 communities receive quality services with dignity.  
5  
6  
7

## 8 **Footnotes**

9  
10 **Author Contributions** SG & AR generated the idea for the survey and the paper, SG and  
11 MZS prepared an analytical plan along with conducting all data analyses. DG and SC worked  
12 on drafting the paper. SG, DG and SC prepared the first draft of the manuscript on which all  
13 co-authors commented.  
14  
15  
16  
17

18 **Funding** This study was supported by Indian Council for Social Science Research  
19 [02/185/SC 2015-16/RPR].  
20  
21  
22

23 **Competing interests** None declared.  
24

25 **Patient consent** Written and verbal consent were obtained from women and guardians  
26 accompanying them, which explained the purpose and content of the survey and that  
27 confidentiality of the information would be maintained.  
28  
29  
30

31 **Ethics approval** Ethical Approval for the study has been taken from King Gorge Medical  
32 University, Lucknow, UP, India.  
33  
34

35 **Provenance and peer review** Not commissioned; externally peer reviewed.  
36  
37

38 **Data sharing statement** For any additional data kindly contact Dr. Srinivas Goli,  
39 [sirispeaks2u@gmail.com](mailto:sirispeaks2u@gmail.com)  
40  
41  
42  
43  
44

## 45 **References**

- 46 1. World Health Organization. World health statistics 2016: monitoring health for the  
47 SDGs sustainable development goals. World Health Organization. 2016
- 48 2. Universal Declaration of Bioethics and Human Rights. Records of the General  
49 Conference of UNESCO; UNESCO: Paris. 2005; 3-21.  
50 <http://unesdoc.unesco.org/images/0014/001428/142825E.pdf>
- 51 3. WHO. Trends in estimates of maternal mortality ratio (MMR; maternal deaths per  
52 100,000 live births) 1990-2015. Source: WHO, UNICEF, UNFPA, World Bank  
53  
54  
55  
56  
57  
58  
59  
60

- 1  
2  
3 Group and UNPD (MMEIG). 2015. Available at  
4 <https://data.unicef.org/topic/maternalhealth/maternal-mortality/#>  
5  
6  
7 4. Kumar, S. Reducing maternal mortality in India: Policy, equity, and quality issues.  
8 Indian Journal of Public Health. 2010; 54(2), 57.  
9  
10 5. Munuswamy, S., Nakamura, K., Seino, K., & Kizuki, M. Inequalities in use of  
11 antenatal care and its service components in India. Journal of Rural Medicine. 2014;  
12 9(1), 10-19.  
13  
14 6. World Health Organization. The prevention and elimination of disrespect and abuse  
15 during facility-based childbirth, World Health Organization. 2016.  
16  
17 [http://www.who.int/reproductivehealth/topics/maternal\\_perinatal/statement-](http://www.who.int/reproductivehealth/topics/maternal_perinatal/statement-childbirth/en/)  
18 [childbirth/en/](http://www.who.int/reproductivehealth/topics/maternal_perinatal/statement-childbirth/en/)  
19  
20 7. Bohren MA, Vogel JP, Hunter EC, Lutsiv O, Makh SK, Souza JP, Aguiar C, Saraiva  
21 Coneglian F, Diniz ALA, Tunçalp Ö, Javadi D, Oladapo OT, Khosla R, Hindin MJ,  
22 Gülmezoglu AM. The mistreatment of women during childbirth in health facilities  
23 globally: a mixed-methods systematic review. PLoS Med. 2015;12(6)  
24 <https://doi.org/10.1371/journal.pmed.1001847>.  
25  
26 8. Diaz-Tello F. Invisible wounds: obstetric violence in the United States. Reprod Health  
27 Matters. 2016;24(47):56–64.  
28  
29 9. Savage, V., & Castro, A. Measuring mistreatment of women during childbirth: a  
30 review of terminology and methodological approaches. Reproductive health, 2017;  
31 14(1), 138.  
32  
33 10. Da-Silva-Carvalho, I., & Santana-Brito, R. Forms of obstetric violence experienced  
34 by mothers who had normal birth. Enfermería Global. 2017; 16(3), 89-97.  
35  
36 11. Vacaflor, C. H. Obstetric violence: a new framework for identifying challenges to  
37 maternal healthcare in Argentina. Reproductive health matters. 2016; 24(47), 65-73.  
38  
39 12. Williams, C. R., Jerez, C., Klein, K., Correa, M., Belizán, J. M., & Cormick, G.  
40 Obstetric violence: A Latin American legal response to mistreatment during  
41 childbirth. BJOG: An International Journal of Obstetrics & Gynaecology. 2018.  
42  
43 13. Perera, D., Lund, R., Swahnberg, K., Schei, B., & Infanti, J. J. ‘When helpers hurt’:  
44 women’s and midwives’ stories of obstetric violence in state health institutions,  
45 Colombo district, Sri Lanka. BMC pregnancy and childbirth. 2018; 18(1), 211.  
46  
47 14. Borges, M. T. A violent birth: reframing coerced procedures during childbirth as  
48 obstetric violence. Duke LJ. 2017; 67, 827.  
49  
50  
51  
52  
53  
54  
55  
56  
57  
58  
59  
60

15. Oliveira, V. J., & Penna, C. M. D. M. Discussing obstetric violence through the voices of women and health professionals. *Texto & Contexto-Enfermagem*. 2017; 26(2).
16. Souza, K. J. D., Rattner, D., & Gubert, M. B. Institutional violence and quality of service in obstetrics are associated with postpartum depression. *Revista de saude publica*. 2017; 51, 69.
17. Diniz, S. G., Salgado, H. D., Andrezzo, H. F., Carvalho, P. G., Carvalho, P. C., Aguiar, C. A., & Niy, D. Y. Abuse and Disrespect In Childbirth Care As A Public Health Issue In Brazil: Origins, Definitions, Impacts On Maternal Health, And Proposals For Its Prevention *Journal of Human Growth and Development*. 2015; 25(3), 377. doi:10.7322/jhgd.106080
18. Pérez D'Gregorio, D. Obstetric violence: A new legal term introduced in Venezuela. *International Journal of Gynecology and Obstetrics*. 2010; 1-2.
19. Fareira, C. Obstetric Violence within the Brazilian Healthcare System: A Critical Analysis of the Childbirth Narratives of Tupinambá Indigenous Women from the Olivença, Ilhéus Community. 2016.
20. McGarry, J., Hinsliff-Smith, K., Watts, K., McCloskey, P., & Evans, C. Experiences and impact of mistreatment and obstetric violence on women during childbearing: a systematic review protocol. *JBIC database of systematic reviews and implementation reports*. 2017; 15(3), 620-627.
21. Sadler, M., Santos, M. J., Ruiz-Berdún, D., Rojas, G. L., Skoko, E., Gillen, P., & Clausen, J. A. Moving beyond disrespect and abuse: addressing the structural dimensions of obstetric violence. *Reproductive health matters*. 2016; 24(47), 47-55.
22. Lukasse M, Schroll AM, Karro H, Schei B, Steingrimsdottir T, Van Parys AS, et al. Prevalence of experienced abuse in healthcare and associated obstetric characteristics in six European countries. *Acta Obstet Gynecol Scand* 2015; 94:508–17.
23. Vora KS, Mavalankar DV, Ramani KV, Upadhyaya M, Sharma B, Iyengar S, Gupta V, Iyengar K. Maternal health situation in India: a case study. *Journal of health, population, and nutrition*. 2009 Apr; 27(2):184.
24. Ram F, Ram US, Singh AB. Future demand for maternal and child health services from public health facilities in Uttar Pradesh. *Journal of family welfare*. 2010; 56.
25. Singh NK, Jha KK, Sharma RK, Verma N. Differential in antenatal care visit: a case study of Uttar Pradesh. *Indian Journal of Maternal and Child Health*. 2015; 17(1):1-7.

- 1  
2  
3 26. Dehury RK, Samal J. Maternal Health Situation in Bihar and Madhya Pradesh: A  
4 Comparative Analysis of State Fact Sheets of National Family Health Survey  
5 (NFHS)-3 and 4. Journal of clinical and diagnostic research: JCDR. 2016 Sep;  
6 10(9):IE01.  
7  
8  
9  
10  
11  
12  
13  
14  
15  
16  
17  
18  
19  
20  
21  
22  
23  
24  
25  
26  
27  
28  
29  
30  
31  
32  
33  
34  
35  
36  
37  
38  
39  
40  
41  
42  
43  
44  
45  
46  
47  
48  
49  
50  
51  
52  
53  
54  
55  
56  
57  
58  
59  
60

For peer review only



**Appendix Table 1** Description of study variable: Definition/Coding

| Name of the variable                       | Definition/Coding                                                                                                                                                                                                                                                                                                                                                                                                                                                                                                                                                                                                                                                                                                                                                                                         |
|--------------------------------------------|-----------------------------------------------------------------------------------------------------------------------------------------------------------------------------------------------------------------------------------------------------------------------------------------------------------------------------------------------------------------------------------------------------------------------------------------------------------------------------------------------------------------------------------------------------------------------------------------------------------------------------------------------------------------------------------------------------------------------------------------------------------------------------------------------------------|
| <i>Outcome variables</i>                   |                                                                                                                                                                                                                                                                                                                                                                                                                                                                                                                                                                                                                                                                                                                                                                                                           |
| Labor room violence                        | Labor room violence was measured as a binary variable using two categories (Yes & No) to the question asked in survey “At the time of delivery, have the doctor/nurse/other health workers/staff of the hospital shouted/abused/hit you?”:                                                                                                                                                                                                                                                                                                                                                                                                                                                                                                                                                                |
| <i>Predictor variables: Socio-economic</i> |                                                                                                                                                                                                                                                                                                                                                                                                                                                                                                                                                                                                                                                                                                                                                                                                           |
| Place of residence                         | Place of residence is recoded into Urban and Rural area.                                                                                                                                                                                                                                                                                                                                                                                                                                                                                                                                                                                                                                                                                                                                                  |
| Religion                                   | The presence of other religions in Uttar Pradesh is nearly negligible which is also reflected in our sample. Therefore, we have classified our sample into Hindu and Muslim.                                                                                                                                                                                                                                                                                                                                                                                                                                                                                                                                                                                                                              |
| Caste                                      | The social groups are recoded into three groups: Scheduled Caste (SC)/Schedule Tribe (ST), Other Backward Castes (OBCs) and General Castes. A system that allows social hierarchal division of people in India.                                                                                                                                                                                                                                                                                                                                                                                                                                                                                                                                                                                           |
| Education of the Mother                    | The educational status of women is coded into three categories: No Education, 1-8 years of schooling and above secondary. These groups are classified in such a way that they have a distinct effect on the nature and level of labor room violence experienced by women.                                                                                                                                                                                                                                                                                                                                                                                                                                                                                                                                 |
| Age of the Mother (in years)               | Age of the mother is categorised into three groups: less than 20 years, 21-29 years and above 30 years. This classification was done by keeping in the mind both the distribution of the sample across the ages and also considering the ideal ages of childbearing.                                                                                                                                                                                                                                                                                                                                                                                                                                                                                                                                      |
| Partner’s Occupation                       | Partner’s occupation has been recoded into two broad groups: Primary/Secondary and Tertiary/Quaternary. These groups are classified in such a way that they have a distinct effect on the nature and level of labor room violence experienced by women.                                                                                                                                                                                                                                                                                                                                                                                                                                                                                                                                                   |
| Any mass media exposure                    | Mass media exposure is a composite variable. It is computed based on women’s exposure to print media (newspaper/magazine), and electric media (television, radio, and cinema). Exposure to any of these media sources was denoted “Yes” Otherwise “No”.                                                                                                                                                                                                                                                                                                                                                                                                                                                                                                                                                   |
| Wealth Quintile                            | The wealth index is based on a variety of household characteristics and assets that are relevant for that country. The wealth index in the survey included 30 household assets. Individuals in the sample were assigned a score based on how their families rank on ownership of assets and other household characteristics using PCA. Following this, we extracted the factor weights for each variable. We then calculated wealth index scores based on these factor weights for each respondent in the national survey dataset. Finally, the population into wealth quintiles based on the wealth index scores was separated to observe the range of wealth index scores for each of the five quintiles. This was further grouped into three categories “Poor”, “Middle”, “Rich” for analysis purpose. |

# BMJ Open

## Title: Labor Room Violence in Uttar Pradesh, India: Evidence from Longitudinal Study of Pregnancy and Childbirth

|                                 |                                                                                                                                                                                                                                                                                                                                                                                                                                                                                                                                                                                                                     |
|---------------------------------|---------------------------------------------------------------------------------------------------------------------------------------------------------------------------------------------------------------------------------------------------------------------------------------------------------------------------------------------------------------------------------------------------------------------------------------------------------------------------------------------------------------------------------------------------------------------------------------------------------------------|
| Journal:                        | <i>BMJ Open</i>                                                                                                                                                                                                                                                                                                                                                                                                                                                                                                                                                                                                     |
| Manuscript ID                   | bmjopen-2018-028688.R1                                                                                                                                                                                                                                                                                                                                                                                                                                                                                                                                                                                              |
| Article Type:                   | Research                                                                                                                                                                                                                                                                                                                                                                                                                                                                                                                                                                                                            |
| Date Submitted by the Author:   | 19-Apr-2019                                                                                                                                                                                                                                                                                                                                                                                                                                                                                                                                                                                                         |
| Complete List of Authors:       | Goli, Srinivas; Jawaharlal Nehru University, Demography<br>Ganguly, Dibyasree; Jawaharlal Nehru University, Centre for Study of Regional Development<br>Chakravorty, Swastika; Jawaharlal Nehru University, Center for study of Regional Development<br>Siddiqui, Mohammad; Jawaharlal Nehru University, School of social sciences<br>Ram, Harchand; Jawaharlal Nehru University, Centre for the Study of Regional Development<br>Rammohan, Anu; The University of Western Australia, Department of Economics<br>Acharya, Sanghamitra ; Jawaharlal Nehru University, Centre of Social Medicine and Community Health |
| <b>Primary Subject Heading</b>: | Obstetrics and gynaecology                                                                                                                                                                                                                                                                                                                                                                                                                                                                                                                                                                                          |
| Secondary Subject Heading:      | Public health, Health policy, Health services research, Sociology                                                                                                                                                                                                                                                                                                                                                                                                                                                                                                                                                   |
| Keywords:                       | OBSTETRICS, Quality in health care < HEALTH SERVICES ADMINISTRATION & MANAGEMENT, Health & safety < HEALTH SERVICES ADMINISTRATION & MANAGEMENT, PUBLIC HEALTH                                                                                                                                                                                                                                                                                                                                                                                                                                                      |
|                                 |                                                                                                                                                                                                                                                                                                                                                                                                                                                                                                                                                                                                                     |

SCHOLARONE™  
Manuscripts

1  
2  
3 **Title: Labor Room Violence in Uttar Pradesh, India: Evidence from**  
4 **Longitudinal Study of Pregnancy and Childbirth**  
5  
6

7 ***First Author***

8 Srinivas Goli [Corresponding Author]  
9 Assistant Professor  
10 Centre for the Study of Regional Development  
11 School of Social Sciences (SSS)  
12 Jawaharlal Nehru University (JNU), Delhi-110067, India  
13 Phone: +91 7042181232  
14 Email: [sirispaks2u@gmail.com](mailto:sirispaks2u@gmail.com)  
15 ORCID: <http://orcid.org/0000-0002-8481-484X>  
16  
17

18 ***Second Author***

19 Dibyasree Ganguly  
20 Doctoral Student, Population Studies  
21 Centre for the Study of Regional Development  
22 School of Social Sciences (SSS)  
23 Jawaharlal Nehru University (JNU), Delhi-110067, India  
24 Phone No: 91+9971435497  
25 Email: [dibyasreeganguly@gmail.com](mailto:dibyasreeganguly@gmail.com)  
26 ORCID: [orcid.org/0000-0001-5677-6316](http://orcid.org/0000-0001-5677-6316)  
27  
28

29 ***Third Author***

30 Swastika Chakravorty  
31 Doctoral Student, Population Studies  
32 Centre for the Study of Regional Development  
33 School of Social Sciences (SSS)  
34 Jawaharlal Nehru University (JNU), Delhi-110067, India  
35 Phone No: 91+8447784208  
36 Email: [swa.cha1992@gmail.com](mailto:swa.cha1992@gmail.com)  
37 ORCID: [orcid.org/0000-0003-3681-9950](http://orcid.org/0000-0003-3681-9950)  
38  
39

40 ***Fourth Author***

41 Mohammad Zahid Siddiqui  
42 Doctoral Student, Population Studies  
43 Centre for the Study of Regional Development  
44 School of Social Sciences (SSS)  
45 Jawaharlal Nehru University (JNU), Delhi-110067, India  
46 Phone No: 91+8800369953  
47 Email: [say2zahid.s@gmail.com](mailto:say2zahid.s@gmail.com)  
48

49 ***Fifth Author***

50 Harchand Ram  
51 Centre for the Study of Regional Development  
52 School of Social Sciences  
53 Jawaharlal Nehru University (JNU)  
54 New Delhi, India  
55 Mobile: (+91) 7506541092  
56 Email ID: [hm8460@gmail.com](mailto:hm8460@gmail.com)  
57

58 ***Sixth Author***

59 Anu Rammohan, PhD  
60

1  
2  
3 Professor, Department of Economics,  
4 The University of Western Australia (M251),  
5 35 Stirling Highway, Crawley WA- 6009, Australia  
6 Phone No: 6488 5656  
7 Email: [anu.rammohan@uwa.edu.au](mailto:anu.rammohan@uwa.edu.au)  
8

9  
10 ***Seventh Author***

11 Sanghamitra Sheel Acharya, PhD  
12 Professor, Centre of Social Medicine and Community Health  
13 Jawaharlal Nehru University (JNU)-110067, India  
14 Phone No: 011-26704433 / 20  
15 Email: [sanghmitra.acharya@gmail.com](mailto:sanghmitra.acharya@gmail.com)  
16

17  
18 **Abstract**

19  
20  
21 **Objectives** The major objective of this study was to investigate the prevalence of labor room  
22 violence [LRV] (one of the forms of obstetric violence) faced by the women during the time  
23 of delivery in Uttar Pradesh [UP] (the largest populous state of India which is also considered  
24 to be a microcosm of India). Further, this study also analyses the association between  
25 prevalence of obstetric violence and socio-economic characteristics of the respondents.  
26  
27

28  
29  
30 **Design** The study was longitudinal in design with the first visit to women made at the time of  
31 first trimester. The second visit was made at the time of second trimester and the last visit  
32 was made after the delivery. However, we have continuously tracked women over phone to  
33 keep record of developments and adverse consequences.  
34  
35  
36

37  
38 **Settings** Urban and rural areas of UP, India.  
39

40  
41 **Participants** Sample of 504 pregnant women was systematically selected from the Integrated  
42 Child Development Scheme (ICDS) Register of pregnant women.  
43  
44

45  
46 **Outcome** We aimed to assess the levels and determinants of LRV using data collected from  
47 504 pregnant women in a longitudinal survey conducted in UP, India. The dataset comprised  
48 of three-waves of survey from the inception of pregnancy to child-birth and postnatal-care.  
49 Logistic Regression model has been used to assess the association between prevalence of  
50 LRV faced by the women at the time of delivery and their background characteristics.  
51  
52  
53

54  
55 **Result** About 15.12% of women are facing LRV in UP, India. Results from logistic  
56 regression model (Odds Ratio [OR]) show that LRV is higher among Muslim women (OR =  
57 1.8, 95% CI [Confidence Interval] 0.7-4.3) relative to Hindu women (OR = 1). The  
58 prevalence of LRV is higher among lower castes relative to General category, and is higher  
59  
60

1  
2  
3 among those women who have no mass media exposure (OR=4.7, 95% CI 1.7-12.8)  
4 compared to those who have (OR=1).  
5  
6

7 **Conclusion** In comparison with global evidence, the level of LRV in India is high. Women  
8 from socially disadvantaged communities are facing higher LRV than their counterparts.  
9  
10

### 11 **Ethical Approval and Consent**

12  
13  
14 The study was approved by expert body of Indian Council for Social Science Research. The  
15 pre-testing and instrument were duly processed through Fatima Hospital, Dr. Ram Manohar  
16 Lohia Institute of Medical Sciences and King George's Medical University. Further, written  
17 and verbal consent was taken from respondents and guardians.  
18  
19  
20

21  
22 **Keywords:** Labor room violence, women, institutional delivery, quality of health care.  
23  
24

25 **Word Count: 2343**

### 26 **Article Summary**

#### 27 **Strengths and limitations of this study**

- 28 • For the first time, the study measures LRV experienced by women in health facilities  
29 in India and factors associated with it.
- 30 • In comparison with global evidence, the level of LRV in India is high. Women from  
31 socially disadvantaged communities are facing higher LRV than their counterparts.
- 32 • The estimated LRV in the survey setting may be lower than actual because of under  
33 reporting due to lack of awareness about forms of obstetric violence.
- 34 • The smaller sample size prevents us from presenting LRV estimates at the greater  
35 disaggregated levels.
- 36 • However, in the absence of information on LRV in existing large scale surveys, the  
37 contribution of this study is significant.  
38  
39  
40  
41  
42  
43  
44  
45  
46  
47  
48  
49  
50

### 51 **Introduction**

52  
53 One of the major targets of the Sustainable Development Goals (SDGs) is to reduce maternal  
54 mortality to 70 per 100,000 live births by 2030<sup>1</sup>. Significant strides have been made in  
55 increasing life expectancy and reducing some of the common killers associated with child  
56 and maternal mortality, but working towards achieving the target of less than 70 maternal  
57  
58  
59  
60

1  
2  
3 deaths per 100,000 live births by 2030 would require significant improvements in the quality  
4 of delivery care. Skilled birth attendance (SBA) has been a cornerstone of international  
5 efforts to reduce maternal mortality and is often measured by the indicators such as  
6 institutional deliveries or deliveries with skilled birth attendance. Recently, the United  
7 Nations Educational, Scientific and Cultural Organisation (UNESCO), in its Universal  
8 Declaration of Bioethics and Human Rights, declared that “health does not depend solely on  
9 scientific and technological research developments, but also on psychosocial and cultural  
10 factors.”<sup>2</sup> Thus, a tacit effort has been made world-wide (including in India) to encourage  
11 institutional deliveries and SBA to ensure good quality of care during child-birth. Yet despite  
12 this, India still continues to contribute disproportionately to the global estimates of maternal  
13 morbidity and mortality. Globally, about 800 women die every day of preventable causes  
14 related to pregnancy and childbirth, 20 per cent of these women are from India.<sup>3</sup> The figures  
15 for institutional deliveries (78.9) and skilled birth attendance deliveries (81.4) in 2015-16 are  
16 also much lower than 100 percent as envisioned by SDGs. India has also failed to meet the  
17 MDG targets related to institutional deliveries and SBA by 2015. There is increasing  
18 attention and wide recognition that many women are deterred from facility-based delivery  
19 because the intrapartum care provided in the facilities does not satisfy the interpersonal and  
20 emotional aspects of this biosocial event. Others believe that the differences in quality of  
21 intrapartum care which arise from a broader aspect social, cultural and economic  
22 discrimination and exclusion, are important for maternal health outcomes.<sup>4-5</sup>

23  
24  
25  
26  
27  
28  
29  
30  
31  
32  
33  
34  
35  
36  
37  
38  
39  
40  
41  
42  
43  
44  
45  
46  
47  
48  
49  
50  
51  
52  
53  
54  
55  
56  
57  
58  
59  
60  
Poor quality care includes disrespectful and abusive care, patient-blaming, purposeful  
neglect, verbal or physical abuse, disregard for traditional beliefs, and the non-use of  
Indigenous languages for patient communication<sup>6,7</sup>. This type of behavior has been classified  
as Obstetric/ Labour Room Violence (LRV)<sup>8</sup>. Worldwide, many women experience  
disrespectful and abusive treatment during childbirth in facilities, although evidence is  
limited in developing countries like India. Further, according to WHO reports “such conduct  
not only violates the rights of women to respectful care, but can also threaten their rights to  
life, health, bodily integrity, and freedom from discrimination”.<sup>9</sup> This statement invites  
greater action, dialogue, research and advocacy on this important public health and human  
rights problem especially in terms of providing respectful maternity care. According to recent  
recommendation suggested by WHO, “Respectful maternity care – which refers to care  
organized for and provided to all women in a manner that maintains their dignity, privacy and

1  
2  
3 confidentiality, ensures freedom from harm and mistreatment, and enables informed choice  
4 and continuous support during labour and childbirth”<sup>10</sup>.  
5  
6  
7

### 8 **LRV: Global Evidence**

9  
10 Prevalence of obstetric violence on women is a shockingly common phenomena for  
11 developing countries (>70% in Tanzania, Brazil). Increasingly, a number of studies on  
12 obstetric violence have focused widely on defining the term obstetric violence and the  
13 mistreatment associated with it. This involves determining forms of obstetric violence,  
14 measurement of different forms of obstetric violence, identifying challenges to maternity  
15 care, the emergent of laws to combat this problem and identifying systematic failures at the  
16 health system level and providing health facility.<sup>11-19</sup> LRV is often associated with adverse  
17 effects on pregnancy outcome. For instance, LRV may lead to issues such as maternal post-  
18 partum depression and post-traumatic stress disorders, particularly if the abuse is extreme. It  
19 is the most cited reason in Latin American countries for women to not return to health  
20 facilities for subsequent pregnancies, which consequently leads to an increase in maternal and  
21 child mortality and morbidities. A body of research mainly concentrated in Latin America  
22 and Europe specifically discusses obstetric violence, its determinants and forms.<sup>11, 20-24</sup>  
23 However, it is critical to generate data relating to disrespectful and abusive care practices  
24 over the pregnancy period and at the time of childbirth, particularly in developing countries  
25 such as India.  
26  
27  
28  
29  
30  
31  
32  
33  
34  
35  
36  
37  
38

### 39 **Methods**

#### 40 **Study design and setting**

41 This study is based on a unique survey conducted under the Project ‘Understanding  
42 pregnancy nutrition and health care among women in rural and urban slums of Uttar Pradesh:  
43 A longitudinal study’. Data was collected during the period June 2016 to July 2016 from a  
44 systematically selected sample of 504 pregnant women from the Integrated Child  
45 Development Scheme (ICDS) Register of pregnant women in selected villages. The study  
46 adopted a two-stage sampling design for both urban and rural areas. In the first stage, PSUs  
47 were selected from the chosen blocks in two districts of survey based on the number of  
48 pregnant women in the villages, where importance was given to villages with the largest  
49 number of pregnant women from diverse social groups. In the identified village, pregnant  
50 women were selected from the register, maintained by the Accredited Social Health Activist  
51 (ASHA) (the community health workers instituted by the Government of India’s Ministry of  
52  
53  
54  
55  
56  
57  
58  
59  
60

1  
2  
3 Health and Family Welfare as part of the National Rural Health Mission (NRHM) and  
4 Anganwadi workers (AWWs) - appointed as functionaries to support health, education and  
5 rural development under ICDS of Ministry of Women and Child Development).  
6  
7

8  
9 The sample size (n=504) is calculated using parameters such as the total number of  
10 pregnancies (n) obtained in each district through Annual Health Survey (2014) and Z values  
11 for getting the estimates representative at 95% confidence interval and design effect at 2%.  
12 The sample is self-weighted where each woman has the equal chance of getting selected. This  
13 study used the information from the first and third wave of the above-mentioned longitudinal  
14 survey. We used the socio-economic and demographic characteristics of women collected in  
15 the first wave and LRV information from the third wave which was conducted after child  
16 birth for all 504 women.  
17  
18  
19  
20  
21  
22  
23

#### 24 Definitions

25 The definition and coding of both outcome and predictor variables are given in appendix  
26 table 1.  
27

#### 28 Data collection and analysis

29 The interview schedule comprised of structured questions in both in Hindi (local language)  
30 and English for the purpose of data collection. The respondents were asked the following  
31 question regarding labor room violence- “At the time of childbirth, have the  
32 doctor/nurse/other health workers/staff of the hospital shouted/abused/hit you?” We have  
33 used bivariate tables to analyse the prevalence of LRV with socio-economic characteristics of  
34 the respondents. Further, logistic regression models were performed to assess the association  
35 between incidence of LRV faced by women at the time of childbirth and their background  
36 characteristics, which includes place of residence, religion, caste, years of schooling of the  
37 women, age of the women, partner’s occupation, any mass media exposure and wealth  
38 quintiles. The statistical analyses have been performed in STATA-14.0 software.  
39  
40  
41  
42  
43  
44  
45  
46  
47  
48

#### 49 Patient and public involvement

50 No patients were involved in the research design, and no patients were directly involved in  
51 the study.  
52  
53

## 54 Results

### 55 Prevalence

56  
57  
58  
59  
60



Despite the known under-reporting of violence against women in India, about 15.12% of women reported LRV in our sample (Table 1).

**Table 1: Bivariate analysis: Prevalence and Factors associated with labour room violence.**

| Background Characteristics         | n   | LRV Prevalence (%) | 95% C.I |       | Chi-Square Value |
|------------------------------------|-----|--------------------|---------|-------|------------------|
|                                    |     |                    | LL      | UL    |                  |
| <b>Place of Residence</b>          |     |                    |         |       |                  |
| Rural                              | 344 | 15.87              | 11.29   | 21.86 | 0.3779           |
| Urban                              | 160 | 19.11              | 11.28   | 30.53 |                  |
| <b>Religion</b>                    |     |                    |         |       |                  |
| Hindu                              | 363 | 16.23              | 11.62   | 22.22 | 0.1341           |
| Islam                              | 141 | 18.18              | 10.47   | 29.70 |                  |
| <b>Caste</b>                       |     |                    |         |       |                  |
| SC/ST                              | 190 | 20.62              | 13.60   | 29.99 | 1.8627           |
| OBC                                | 227 | 15.18              | 9.58    | 23.21 |                  |
| General                            | 87  | 12.50              | 5.56    | 25.76 |                  |
| <b>Years of schooling of women</b> |     |                    |         |       |                  |
| 0                                  | 183 | 20.0               | 12.87   | 29.74 | 1.1504           |
| 1-8                                | 209 | 15.6               | 9.85    | 23.81 |                  |
| 9 and above                        | 112 | 13.79              | 6.90    | 25.67 |                  |
| <b>Age of the Women</b>            |     |                    |         |       |                  |
| Youngest - 20                      | 69  | 12.0               | 3.60    | 33.27 | 0.5610           |
| 21-29                              | 368 | 17.62              | 12.83   | 23.71 |                  |
| 30 - oldest                        | 67  | 15.38              | 6.82    | 31.12 |                  |
| <b>Partner's occupation</b>        |     |                    |         |       |                  |
| Primary/Secondary                  | 330 | 20.12              | 14.69   | 26.91 | 4.0636*          |
| Tertiary/Quaternary                | 174 | 10.23              | 5.34    | 18.71 |                  |
| <b>Any Mass Media Exposure</b>     |     |                    |         |       |                  |
| Yes                                | 330 | 12.72              | 8.49    | 18.63 | 6.1235**         |
| No                                 | 174 | 25.0               | 16.76   | 35.56 |                  |
| <b>Wealth Quintiles</b>            |     |                    |         |       |                  |
| Poor                               | 168 | 16.88              | 9.94    | 27.21 | 0.0063           |
| Middle                             | 168 | 16.84              | 10.49   | 25.93 |                  |
| Rich                               | 168 | 16.47              | 9.90    | 26.14 |                  |

Note: Significance levels  $p < 0.05^*$ ,  $p < 0.01^{**}$ ,  $p < 0.001^{***}$ ; LL: Lower Limit, UL: Upper Limit; C.I: Confidence Interval

The prevalence of LRV is more pronounced in urban areas (19%) as relative to rural (16%). Similarly, the prevalence of LRV is more among Muslim (18%) as compared to Hindu (16%) women. Further, there is significant variation in prevalence of LRV among different caste groups i.e., Scheduled Castes (SCs) (20.6 %), OBC (15.2 %) and general category (12.5 %). The educational status of the women also plays a significant role in determining the prevalence of LRV. Prevalence of LRV is higher for those women with no education (20%)

compared to those women with few years of schooling. Furthermore, the variable partner's occupation also showed some variation in the prevalence of LRV. Specifically, LRV is more common among women whose husband is employed in Primary/Secondary activities (20.1%) compared to those involved in Tertiary activities (10.2 %). The wealth gradient is also important in assessing the prevalence of LRV. The most significant predictor of LRV is mass media exposure, with women who have some mass media exposure facing less violence (12.7%) as compared to women who have no mass media exposure (25%).

### Correlates

Logistic regression model (Table 2) shows that the variables- religion, caste, partner's occupation and mass media exposure are statistically significant and associated with the prevalence of LRV faced by women, after controlling for other correlates.

**Table 2: Logistic Regression estimates: Factors affecting labor room violence**

|                                    | Odds Ratio | 95% C.I |        |
|------------------------------------|------------|---------|--------|
|                                    |            | LL      | UL     |
| <b>Place of Residence</b>          |            |         |        |
| Urban                              | 1          |         |        |
| Rural                              | 1.126      | 0.464   | 2.732  |
| <b>Religion</b>                    |            |         |        |
| Hindu                              | 1          |         |        |
| Islam                              | 1.753*     | 0.722   | 4.255  |
| <b>Caste</b>                       |            |         |        |
| SC/ST                              | 1          |         |        |
| OBC                                | 0.619      | 0.262   | 1.462  |
| General                            | 0.473*     | 0.149   | 1.504  |
| <b>Years of schooling of women</b> |            |         |        |
| 0                                  | 1          |         |        |
| 1-8                                | 0.817      | 0.358   | 1.866  |
| 9 and above                        | 0.661      | 0.217   | 2.016  |
| <b>Age of the Women</b>            |            |         |        |
| Youngest - 20                      | 1          |         |        |
| 21-29                              | 1.303      | 0.345   | 4.923  |
| 30 - oldest                        | 0.970      | 0.197   | 4.782  |
| <b>Partner's occupation</b>        |            |         |        |
| Primary/Secondary                  | 1          |         |        |
| Tertiary/Quaternary                | 0.402**    | 0.169   | 0.959  |
| <b>Any Mass Media Exposure</b>     |            |         |        |
| Yes                                | 1          |         |        |
| No                                 | 4.688***   | 1.713   | 12.831 |
| <b>Wealth Quintiles</b>            |            |         |        |
| Poor                               | 1          |         |        |
| Middle                             | 0.923      | 0.356   | 2.395  |

|      |       |       |       |
|------|-------|-------|-------|
| Rich | 0.654 | 0.165 | 2.598 |
|------|-------|-------|-------|

Note: Significance levels  $p < 0.05^*$ ,  $p < 0.01^{**}$ ,  $p < 0.001^{***}$ ; LL: Lower Limit, UL: Upper Limit, C.I: Confidence Interval

The odds of the occurrence of LRV is higher among Muslim women (Odds Ratio [OR] = 1.8, 95% CI [Confidence Interval] 0.7-4.3) relative to Hindu women (OR = 1). Among social groups, with reference to SCs (OR = 1), the odds of occurrence of violence faced by women is half among General category (OR = 0.5, 95% CI 0.1-1.5) and Other Backward Class (OBC) (OR = 0.6, 95% CI 0.3-1.5). In terms of partner's occupation, the odds of violence is less than half for women those partners were engaged in Tertiary activities (OR = 0.4, 95% CI 0.2-1) in comparison to Primary/Secondary activities (OR = 1). The occurrence of violence for the women those who have no mass media exposure (OR = 4.7, 95% CI 1.7-12.8) is about five times higher than those who have mass media exposure (OR = 1).

## Discussion

### Main Findings of this study

Given the context of the WHO pledge, that every woman has the right to the highest attainable standard of health which also includes the right to dignified, respectful health care. This paper, for the first time, empirically reports the occurrence of LRV and its socioeconomic correlates in India. The findings are important in the Indian context where health care delivery is dominated by the social hierarchies, and disadvantaged communities struggle to have a place in the health system and receive appropriate health care with dignity. Therefore, the findings of this study underpin the need to explore more on the issue of LRV with more in-depth and large scale studies. Despite significant under-reporting of violence in India, the estimate of LRV in this study is high and varies according to the socio-economic characteristics of the female respondent. Although, caste, religion, place of residence and partner's occupation emerged as significant factors associated with LRV; it is the exposure to mass media which shows the highest disparity in the occurrence of LRV. Thus, it particularly highlights the importance of awareness and knowledge about reproductive rights and entitlements of women in the health system. This can play significant role in determining the rate of LRV.

### Limitations of the study

1  
2  
3 Although the results of the survey indicate a high prevalence of LRV relative to studies from  
4 other developed countries<sup>11</sup>, but this study suffers from the issue of under-reporting due to  
5 lack of awareness about forms and nature of obstetric violence in the survey setting. Further,  
6 as with other micro studies, the study suffers from the short-coming of small sample size.  
7 However, in the absence of information on LRV in existing large scale surveys, the  
8 contribution of this study is significant.  
9

### 14 **What is already known on this topic**

16 In developing countries like India where maternal and child health indicators are far from  
17 satisfactory with poor medical and public health ethics in health care delivery system,  
18 coupled with other barriers such as gender and social inequality, lack of accountability by the  
19 service providers and health system inefficiencies, the high prevalence of LRV raises an  
20 important policy question. To date the major concern for policy makers has been to increase  
21 the demand for health care services; so less attention is paid to the supply side barriers  
22 including the quality of health care services and related ethical standards. Due to the lack of  
23 availability of data, in-depth studies on LRV are absent for India.  
24  
25  
26  
27  
28  
29

31 In India, given the hierarchal nature of the society, it is imperative to study the access to  
32 health facilities and women's experience of receiving health care with dignity within a socio-  
33 economic framework. Studies based on experiences of Latin American women of Indigenous  
34 origin insist that women from poor, indigenous or socially backward classes receive "triple  
35 discrimination" i.e., by being female, being an ethnic minority and of lower socio-economic  
36 status.<sup>19</sup> Even in egalitarian European societies, women facing economic hardships and  
37 negative life events with the least social support have higher chance of experiencing LRV  
38 than their counterparts.<sup>25, 26</sup>  
39  
40  
41  
42  
43  
44

### 46 **What this study adds**

48 Although obstetric violence on women has received increasing global attention, developing  
49 countries have yet to address deficiencies in this area. The Government of India has already  
50 implemented several policies and interventions aimed towards providing adequate maternal  
51 health care services to all. The quality of maternal health care services is one of the major  
52 components integral to the improvement of maternal and child health, a long neglected area  
53 for policy-makers. With the emergence of various government interventions, the number of  
54 service providers has increased, but assuring quality and dignity in health care delivery  
55  
56  
57  
58  
59  
60

remains a major concern. However, contemporary studies in India<sup>27-29</sup> with regards to maternal health care are mainly based on large population-level datasets focusing on availability and accessibility of maternal health care services. However, there is a research gap in the assessment of quality of those services and evaluating the nature of treatment provided by the health care workers, which is critically needed to improve public health care delivery system. Given this context, our study fills a critical knowledge gap by providing robust quantitative evidence on LRV experienced by pregnant women at health facilities. Issues such as LRV raise concerns not only on medical or hospital ethical standards in India but also on the violation of the reproductive rights of women.

## Conclusions

In comparison to global evidence, the level of LRV in India is high. Women from socially disadvantaged communities are facing higher LRV than their counterparts. For any further progress in pregnancy outcomes in India, policy makers should focus not only on the availability and accessibility of services, but also on ensuring quality of care and dignity of the receivers. Countries such as India must improve its ethical standards in health care delivery where people from all sections of society, especially those from marginalised communities receive quality services with dignity.

## Footnotes

**Author Contributions** SG & AR generated the idea for the survey and the paper, SG, MZS and HR prepared an analytical plan along with conducting all data analyses. DG and SC worked on drafting the paper. SG, DG and SC prepared the first draft of the manuscript on which AR & SA provided critical comments after careful review.

**Funding** This study was supported by Indian Council for Social Science Research [02/185/SC 2015-16/RPR].

**Competing interests** None declared.

**Patient consent** Written and verbal consent were obtained from women and guardians accompanying them, which explained the purpose and content of the survey and that confidentiality of the information would be maintained.

**Ethics approval** The study was approved by expert body of Indian Council for Social Science Research. The pre-testing and instrument were duly processed through Fatima Hospital, Dr. Ram Manohar Lohia Institute of Medical Sciences and King George's Medical University. Further, written and verbal consent was taken from respondents and guardians.

**Provenance and peer review** Not commissioned; externally peer reviewed.

**Data sharing statement** Data can be made available on reasonable request. For any further queries regarding data availability kindly contact Dr. Srinivas Goli, sirispeaks2u@gmail.com

## References

1. World Health Organization. World health statistics 2016: monitoring health for the SDGs sustainable development goals. World Health Organization. 2016
2. Universal Declaration of Bioethics and Human Rights. Records of the General Conference of UNESCO; UNESCO: Paris. 2005; 3-21. <http://unesdoc.unesco.org/images/0014/001428/142825E.pdf>
3. WHO. Trends in estimates of maternal mortality ratio (MMR; maternal deaths per 100,000 live births) 1990-2015. Source: WHO, UNICEF, UNFPA, World Bank Group and UNPD (MMEIG). 2015. Available at <https://data.unicef.org/topic/maternalhealth/maternal-mortality/#>
4. Kumar, S. Reducing maternal mortality in India: Policy, equity, and quality issues. *Indian Journal of Public Health*. 2010; 54(2), 57.
5. Munuswamy, S., Nakamura, K., Seino, K., & Kizuki, M. Inequalities in use of antenatal care and its service components in India. *Journal of Rural Medicine*. 2014; 9(1), 10-19.
6. Da-Silva-Carvalho, I., & Santana-Brito, R. (2017). Forms of obstetric violence experienced by mothers who had normal birth. *Enfermería Global*, 16(3), 89-97.
7. Savage, V., & Castro, A. (2017). Measuring mistreatment of women during childbirth: a review of terminology and methodological approaches. *Reproductive health*, 14(1), 138.
8. Bohren MA, Vogel JP, Hunter EC, Lutsiv O, Makh SK, Souza JP, Aguiar C, Saraiva Coneglian F, Diniz ALA, Tunçalp Ö, Javadi D, Oladapo OT, Khosla R, Hindin MJ, Gülmezoglu AM. The mistreatment of women during childbirth in health facilities globally: a mixed-methods systematic review. *PLoS Med*. 2015;12(6) <https://doi.org/10.1371/journal.pmed.1001847>.

- 1  
2  
3 9. World Health Organization. (2014). WHO Statement: The prevention and elimination  
4 of disrespect and abuse during facility-based childbirth. Geneva: World Health  
5 Organization.  
6  
7
- 8 10. World Health Organization (2018). WHO recommendations: intrapartum care for a  
9 positive childbirth experience. Geneva: World Health Organization.  
10
- 11 11. Diaz-Tello F. Invisible wounds: obstetric violence in the United States. *Reprod Health*  
12 *Matters*. 2016;24(47):56–64.  
13
- 14 12. Savage, V., & Castro, A. Measuring mistreatment of women during childbirth: a  
15 review of terminology and methodological approaches. *Reproductive health*, 2017;  
16 14(1), 138.  
17
- 18 13. Da-Silva-Carvalho, I., & Santana-Brito, R. Forms of obstetric violence experienced  
19 by mothers who had normal birth. *Enfermería Global*. 2017; 16(3), 89-97.  
20
- 21 14. Vacaflor, C. H. Obstetric violence: a new framework for identifying challenges to  
22 maternal healthcare in Argentina. *Reproductive health matters*. 2016; 24(47), 65-73.  
23
- 24 15. Williams, C. R., Jerez, C., Klein, K., Correa, M., Belizán, J. M., & Cormick, G.  
25 Obstetric violence: A Latin American legal response to mistreatment during  
26 childbirth. *BJOG: An International Journal of Obstetrics & Gynaecology*. 2018.  
27
- 28 16. Perera, D., Lund, R., Swahnberg, K., Schei, B., & Infanti, J. J. ‘When helpers hurt’:  
29 women’s and midwives’ stories of obstetric violence in state health institutions,  
30 Colombo district, Sri Lanka. *BMC pregnancy and childbirth*. 2018; 18(1), 211.  
31
- 32 17. Borges, M. T. A violent birth: reframing coerced procedures during childbirth as  
33 obstetric violence. *Duke LJ*. 2017; 67, 827.  
34
- 35 18. Oliveira, V. J., & Penna, C. M. D. M. Discussing obstetric violence through the  
36 voices of women and health professionals. *Texto & Contexto-Enfermagem*. 2017;  
37 26(2).  
38
- 39 19. Souza, K. J. D., Rattner, D., & Gubert, M. B. Institutional violence and quality of  
40 service in obstetrics are associated with postpartum depression. *Revista de saude*  
41 *publica*. 2017; 51, 69.  
42
- 43 20. Diniz, S. G., Salgado, H. D., Andrezzo, H. F., Carvalho, P. G., Carvalho, P. C.,  
44 Aguiar, C. A., & Niy, D. Y. Abuse and Disrespect In Childbirth Care As A Public  
45 Health Issue In Brazil: Origins, Definitions, Impacts On Maternal Health, And  
46 Proposals For Its Prevention *Journal of Human Growth and Development*. 2015;  
47 25(3), 377. doi:10.7322/jhgd.106080  
48  
49  
50  
51  
52  
53  
54  
55  
56  
57  
58  
59  
60

- 1  
2  
3 21. Pérez D'Gregorio, D. Obstetric violence: A new legal term introduced in Venezuela.  
4 International Journal of Gynecology and Obstetrics. 2010; 1-2.  
5
- 6 22. Fareira, C. Obstetric Violence within the Brazilian Healthcare System: A Critical  
7 Analysis of the Childbirth Narratives of Tupinambá Indigenous Women from the  
8 Olivença, Ilhéus Community. 2016.  
9
- 10 23. McGarry, J., Hinsliff-Smith, K., Watts, K., McCloskey, P., & Evans, C. Experiences  
11 and impact of mistreatment and obstetric violence on women during childbearing: a  
12 systematic review protocol. JBI database of systematic reviews and implementation  
13 reports. 2017; 15(3), 620-627.  
14
- 15 24. Sadler, M., Santos, M. J., Ruiz-Berdún, D., Rojas, G. L., Skoko, E., Gillen, P., &  
16 Clausen, J. A. Moving beyond disrespect and abuse: addressing the structural  
17 dimensions of obstetric violence. Reproductive health matters. 2016; 24(47), 47-55.  
18
- 19 25. Lukasse M, Schroll AM, Karro H, Schei B, Steingrimsdottir T, Van Parys AS, et al.  
20 Prevalence of experienced abuse in healthcare and associated obstetric characteristics  
21 in six European countries. Acta Obstet Gynecol Scand 2015; 94:508–17.  
22
- 23 26. Vora KS, Mavalankar DV, Ramani KV, Upadhyaya M, Sharma B, Iyengar S, Gupta  
24 V, Iyengar K. Maternal health situation in India: a case study. Journal of health,  
25 population, and nutrition. 2009 Apr; 27(2):184.  
26
- 27 27. Ram F, Ram US, Singh AB. Future demand for maternal and child health services  
28 from public health facilities in Uttar Pradesh. Journal of family welfare. 2010; 56.  
29
- 30 28. Singh NK, Jha KK, Sharma RK, Verma N. Differential in antenatal care visit: a case  
31 study of Uttar Pradesh. Indian Journal of Maternal and Child Health. 2015; 17(1):1-7.  
32
- 33 29. Dehury RK, Samal J. Maternal Health Situation in Bihar and Madhya Pradesh: A  
34 Comparative Analysis of State Fact Sheets of National Family Health Survey  
35 (NFHS)-3 and 4. Journal of clinical and diagnostic research: JCDR. 2016 Sep;  
36 10(9):IE01.  
37  
38  
39  
40  
41  
42  
43  
44  
45  
46  
47  
48  
49  
50  
51  
52  
53  
54  
55  
56  
57  
58  
59  
60



**Appendix Table 1** Description of study variable: Definition/Coding

| Name of the variable                       | Definition/Coding                                                                                                                                                                                                                                                                                                                                                                                                                                                                                                                                                                                                                                                                                                                                                                                                                                                                                                                                                                                                                                                 |
|--------------------------------------------|-------------------------------------------------------------------------------------------------------------------------------------------------------------------------------------------------------------------------------------------------------------------------------------------------------------------------------------------------------------------------------------------------------------------------------------------------------------------------------------------------------------------------------------------------------------------------------------------------------------------------------------------------------------------------------------------------------------------------------------------------------------------------------------------------------------------------------------------------------------------------------------------------------------------------------------------------------------------------------------------------------------------------------------------------------------------|
| <i>Outcome variables</i>                   |                                                                                                                                                                                                                                                                                                                                                                                                                                                                                                                                                                                                                                                                                                                                                                                                                                                                                                                                                                                                                                                                   |
| Labor room violence                        | Labor room violence was measured as a binary variable using two categories (Yes & No) to the question asked in survey “At the time of delivery, have the doctor/nurse/other health workers/staff of the hospital shouted/abused/hit you?”:                                                                                                                                                                                                                                                                                                                                                                                                                                                                                                                                                                                                                                                                                                                                                                                                                        |
| <i>Predictor variables: Socio-economic</i> |                                                                                                                                                                                                                                                                                                                                                                                                                                                                                                                                                                                                                                                                                                                                                                                                                                                                                                                                                                                                                                                                   |
| Place of residence                         | Place of residence is recoded into Urban and Rural area.                                                                                                                                                                                                                                                                                                                                                                                                                                                                                                                                                                                                                                                                                                                                                                                                                                                                                                                                                                                                          |
| Religion                                   | The presence of other religions in Uttar Pradesh is nearly negligible which is also reflected in our sample. Therefore, we have classified our sample into Hindu and Muslim.                                                                                                                                                                                                                                                                                                                                                                                                                                                                                                                                                                                                                                                                                                                                                                                                                                                                                      |
| Caste                                      | The social groups are recoded into three groups: Scheduled Caste (SC)/Schedule Tribe (ST), Other Backward Castes (OBCs) and General Castes. A system that allows social hierarchal division of people in India.                                                                                                                                                                                                                                                                                                                                                                                                                                                                                                                                                                                                                                                                                                                                                                                                                                                   |
| Education of the Mother                    | The educational status of women is coded into three categories: No Education, 1-8 years of schooling and above secondary. These groups are classified in such a way that they have a distinct effect on the nature and level of labor room violence experienced by women.                                                                                                                                                                                                                                                                                                                                                                                                                                                                                                                                                                                                                                                                                                                                                                                         |
| Age of the Mother (in years)               | Age of the mother is categorised into three groups: less than 20 years, 21-29 years and above 30 years. This classification was done by keeping in the mind both the distribution of the sample across the ages and also considering the ideal ages of childbearing.                                                                                                                                                                                                                                                                                                                                                                                                                                                                                                                                                                                                                                                                                                                                                                                              |
| Partner’s Occupation                       | Partner’s occupation has been recoded into two broad groups: Primary/Secondary and Tertiary/Quaternary. These groups are classified in such a way that they have a distinct effect on the nature and level of labor room violence experienced by women. Activities related to primary activities include agriculture (both commercial and subsistence), forestry, mining, farming, grazing, fishing, hunting and gathering, and quarrying. It also includes packaging and processing of the raw material related to these activities. Example for secondary occupation are- textile production, metal working and smelting, automobile production, aerospace manufacturing, chemical and engineering industries, engineering, construction, shipbuilding, energy utilities, breweries and bottlers. Activities includes in this sector are- transportation and distribution, restaurants, clerical services, retail and wholesale sales, entertainment (television, movies, theater, radio, music, etc.), media, tourism, law, insurance, banking and healthcare. |
| Any mass media exposure                    | Mass media exposure is a composite variable. It is computed based on women’s exposure to print media (newspaper/magazine), and electric media (television, radio, and cinema). Exposure to any of these media sources was denoted “Yes” Otherwise “No”.                                                                                                                                                                                                                                                                                                                                                                                                                                                                                                                                                                                                                                                                                                                                                                                                           |
| Wealth Quintile                            | The wealth index is based on a variety of household characteristics and assets that are relevant for that country. The wealth index in the survey included 30 household assets. Individuals in the sample were assigned a score based on how their families rank on ownership of assets and other household characteristics using PCA. Following this, we extracted the factor weights for each variable. We then calculated wealth index scores based on these factor weights for each respondent in the national survey dataset. Finally, the population into wealth quintiles based on the wealth index scores was separated to observe the range of wealth index scores for each of the five quintiles. This was further grouped into three categories “Poor”, “Middle”, “Rich” for analysis purpose.                                                                                                                                                                                                                                                         |

# Reporting checklist for cohort study.

Based on the STROBE cohort guidelines.

## Instructions to authors

Complete this checklist by entering the page numbers from your manuscript where readers will find each of the items listed below.

Your article may not currently address all the items on the checklist. Please modify your text to include the missing information. If you are certain that an item does not apply, please write "n/a" and provide a short explanation.

Upload your completed checklist as an extra file when you submit to a journal.

In your methods section, say that you used the STROBE cohort reporting guidelines, and cite them as:

von Elm E, Altman DG, Egger M, Pocock SJ, Gøtzsche PC, Vandenbroucke JP. The Strengthening the Reporting of Observational Studies in Epidemiology (STROBE) Statement: guidelines for reporting observational studies.

|                        |                     | Reporting Item                                                                                                                  | Page Number |
|------------------------|---------------------|---------------------------------------------------------------------------------------------------------------------------------|-------------|
| Title                  | <a href="#">#1a</a> | Indicate the study's design with a commonly used term in the title or the abstract                                              | 1           |
| Abstract               | <a href="#">#1b</a> | Provide in the abstract an informative and balanced summary of what was done and what was found                                 | 2-3         |
| Background / rationale | <a href="#">#2</a>  | Explain the scientific background and rationale for the investigation being reported                                            | 3-5         |
| Objectives             | <a href="#">#3</a>  | State specific objectives, including any prespecified hypotheses                                                                | 2           |
| Study design           | <a href="#">#4</a>  | Present key elements of study design early in the paper                                                                         | 5-6         |
| Setting                | <a href="#">#5</a>  | Describe the setting, locations, and relevant dates, including periods of recruitment, exposure, follow-up, and data collection | 5-6         |
| Eligibility criteria   | <a href="#">#6a</a> | Give the eligibility criteria, and the sources and methods of                                                                   | 5-6         |

selection of participants. Describe methods of follow-up.

|    |                  |                      |                                                                 |
|----|------------------|----------------------|-----------------------------------------------------------------|
| 1  |                  |                      |                                                                 |
| 2  |                  |                      |                                                                 |
| 3  |                  | <a href="#">#6b</a>  | For matched studies, give matching criteria and number of       |
| 4  |                  |                      | exposed and unexposed                                           |
| 5  |                  |                      |                                                                 |
| 6  | Variables        | <a href="#">#7</a>   | Clearly define all outcomes, exposures, predictors, potential   |
| 7  |                  |                      | confounders, and effect modifiers. Give diagnostic criteria, if |
| 8  |                  |                      | applicable                                                      |
| 9  |                  |                      | 6 &                                                             |
| 10 |                  |                      | Appendix                                                        |
| 11 |                  |                      | table                                                           |
| 12 | Data sources /   | <a href="#">#8</a>   | For each variable of interest give sources of data and details  |
| 13 | measurement      |                      | of methods of assessment (measurement). Describe                |
| 14 |                  |                      | comparability of assessment methods if there is more than       |
| 15 |                  |                      | one group. Give information separately for exposed and          |
| 16 |                  |                      | unexposed groups if applicable.                                 |
| 17 |                  |                      |                                                                 |
| 18 |                  |                      |                                                                 |
| 19 |                  |                      |                                                                 |
| 20 | Bias             | <a href="#">#9</a>   | Describe any efforts to address potential sources of bias       |
| 21 |                  |                      |                                                                 |
| 22 | Study size       | <a href="#">#10</a>  | Explain how the study size was arrived at                       |
| 23 |                  |                      | 6                                                               |
| 24 | Quantitative     | <a href="#">#11</a>  | Explain how quantitative variables were handled in the          |
| 25 | variables        |                      | analyses. If applicable, describe which groupings were          |
| 26 |                  |                      | chosen, and why                                                 |
| 27 |                  |                      |                                                                 |
| 28 |                  |                      |                                                                 |
| 29 |                  |                      |                                                                 |
| 30 | Statistical      | <a href="#">#12a</a> | Describe all statistical methods, including those used to       |
| 31 | methods          |                      | control for confounding                                         |
| 32 |                  |                      | 6                                                               |
| 33 |                  |                      |                                                                 |
| 34 |                  | <a href="#">#12b</a> | Describe any methods used to examine subgroups and              |
| 35 |                  |                      | interactions                                                    |
| 36 |                  |                      |                                                                 |
| 37 |                  | <a href="#">#12c</a> | Explain how missing data were addressed                         |
| 38 |                  |                      |                                                                 |
| 39 |                  | <a href="#">#12d</a> | If applicable, explain how loss to follow-up was addressed      |
| 40 |                  |                      |                                                                 |
| 41 |                  | <a href="#">#12e</a> | Describe any sensitivity analyses                               |
| 42 |                  |                      |                                                                 |
| 43 |                  |                      |                                                                 |
| 44 | Participants     | <a href="#">#13a</a> | Report numbers of individuals at each stage of study—eg         |
| 45 |                  |                      | numbers potentially eligible, examined for eligibility,         |
| 46 |                  |                      | confirmed eligible, included in the study, completing follow-   |
| 47 |                  |                      | up, and analysed. Give information separately for for           |
| 48 |                  |                      | exposed and unexposed groups if applicable.                     |
| 49 |                  |                      |                                                                 |
| 50 |                  |                      |                                                                 |
| 51 |                  |                      |                                                                 |
| 52 |                  | <a href="#">#13b</a> | Give reasons for non-participation at each stage                |
| 53 |                  |                      |                                                                 |
| 54 |                  | <a href="#">#13c</a> | Consider use of a flow diagram                                  |
| 55 |                  |                      |                                                                 |
| 56 |                  |                      |                                                                 |
| 57 | Descriptive data | <a href="#">#14a</a> | Give characteristics of study participants (eg demographic,     |
| 58 |                  |                      |                                                                 |
| 59 |                  |                      |                                                                 |
| 60 |                  |                      |                                                                 |

clinical, social) and information on exposures and potential confounders. Give information separately for exposed and unexposed groups if applicable.

|    |                  |                      |                                                                   |
|----|------------------|----------------------|-------------------------------------------------------------------|
| 1  |                  |                      |                                                                   |
| 2  |                  |                      |                                                                   |
| 3  |                  |                      |                                                                   |
| 4  |                  |                      |                                                                   |
| 5  |                  |                      |                                                                   |
| 6  |                  | <a href="#">#14b</a> | Indicate number of participants with missing data for each        |
| 7  |                  |                      | variable of interest                                              |
| 8  |                  |                      |                                                                   |
| 9  |                  | <a href="#">#14c</a> | Summarise follow-up time (eg, average and total amount)           |
| 10 |                  |                      |                                                                   |
| 11 | Outcome data     | <a href="#">#15</a>  | Report numbers of outcome events or summary measures              |
| 12 |                  |                      | over time. Give information separately for exposed and            |
| 13 |                  |                      | unexposed groups if applicable.                                   |
| 14 |                  |                      |                                                                   |
| 15 |                  |                      |                                                                   |
| 16 |                  |                      |                                                                   |
| 17 | Main results     | <a href="#">#16a</a> | Give unadjusted estimates and, if applicable, confounder-         |
| 18 |                  |                      | adjusted estimates and their precision (eg, 95% confidence        |
| 19 |                  |                      | interval). Make clear which confounders were adjusted for         |
| 20 |                  |                      | and why they were included                                        |
| 21 |                  |                      |                                                                   |
| 22 |                  |                      |                                                                   |
| 23 |                  |                      |                                                                   |
| 24 |                  | <a href="#">#16b</a> | Report category boundaries when continuous variables were         |
| 25 |                  |                      | categorized                                                       |
| 26 |                  |                      |                                                                   |
| 27 |                  |                      |                                                                   |
| 28 |                  | <a href="#">#16c</a> | If relevant, consider translating estimates of relative risk into |
| 29 |                  |                      | absolute risk for a meaningful time period                        |
| 30 |                  |                      |                                                                   |
| 31 | Other analyses   | <a href="#">#17</a>  | Report other analyses done—e.g., analyses of subgroups            |
| 32 |                  |                      | and interactions, and sensitivity analyses                        |
| 33 |                  |                      |                                                                   |
| 34 |                  |                      |                                                                   |
| 35 | Key results      | <a href="#">#18</a>  | Summarise key results with reference to study objectives          |
| 36 |                  |                      | 6-9                                                               |
| 37 | Limitations      | <a href="#">#19</a>  | Discuss limitations of the study, taking into account sources     |
| 38 |                  |                      | of potential bias or imprecision. Discuss both direction and      |
| 39 |                  |                      | magnitude of any potential bias.                                  |
| 40 |                  |                      |                                                                   |
| 41 |                  |                      |                                                                   |
| 42 |                  |                      |                                                                   |
| 43 | Interpretation   | <a href="#">#20</a>  | Give a cautious overall interpretation considering objectives,    |
| 44 |                  |                      | limitations, multiplicity of analyses, results from similar       |
| 45 |                  |                      | studies, and other relevant evidence.                             |
| 46 |                  |                      |                                                                   |
| 47 |                  |                      |                                                                   |
| 48 | Generalisability | <a href="#">#21</a>  | Discuss the generalisability (external validity) of the study     |
| 49 |                  |                      | results                                                           |
| 50 |                  |                      |                                                                   |
| 51 |                  |                      |                                                                   |
| 52 | Funding          | <a href="#">#22</a>  | Give the source of funding and the role of the funders for the    |
| 53 |                  |                      | present study and, if applicable, for the original study on       |
| 54 |                  |                      | which the present article is based                                |
| 55 |                  |                      |                                                                   |
| 56 |                  |                      |                                                                   |
| 57 |                  |                      |                                                                   |
| 58 |                  |                      |                                                                   |
| 59 |                  |                      |                                                                   |
| 60 |                  |                      |                                                                   |

1 The STROBE checklist is distributed under the terms of the Creative Commons Attribution License  
2 CC-BY. This checklist can be completed online using <https://www.goodreports.org/>, a tool made by  
3 the [EQUATOR Network](#) in collaboration with [Penelope.ai](#)  
4  
5  
6  
7  
8  
9  
10  
11  
12  
13  
14  
15  
16  
17  
18  
19  
20  
21  
22  
23  
24  
25  
26  
27  
28  
29  
30  
31  
32  
33  
34  
35  
36  
37  
38  
39  
40  
41  
42  
43  
44  
45  
46  
47  
48  
49  
50  
51  
52  
53  
54  
55  
56  
57  
58  
59  
60

For peer review only

# BMJ Open

## Labor Room Violence in Uttar Pradesh, India: Evidence from Longitudinal Study of Pregnancy and Childbirth

|                                 |                                                                                                                                                                                                                                                                                                                                                                                                                                                                                                                                                                                                                     |
|---------------------------------|---------------------------------------------------------------------------------------------------------------------------------------------------------------------------------------------------------------------------------------------------------------------------------------------------------------------------------------------------------------------------------------------------------------------------------------------------------------------------------------------------------------------------------------------------------------------------------------------------------------------|
| Journal:                        | <i>BMJ Open</i>                                                                                                                                                                                                                                                                                                                                                                                                                                                                                                                                                                                                     |
| Manuscript ID                   | bmjopen-2018-028688.R2                                                                                                                                                                                                                                                                                                                                                                                                                                                                                                                                                                                              |
| Article Type:                   | Research                                                                                                                                                                                                                                                                                                                                                                                                                                                                                                                                                                                                            |
| Date Submitted by the Author:   | 27-May-2019                                                                                                                                                                                                                                                                                                                                                                                                                                                                                                                                                                                                         |
| Complete List of Authors:       | Goli, Srinivas; Jawaharlal Nehru University, Demography<br>Ganguly, Dibyasree; Jawaharlal Nehru University, Centre for Study of Regional Development<br>Chakravorty, Swastika; Jawaharlal Nehru University, Center for study of Regional Development<br>Siddiqui, Mohammad; Jawaharlal Nehru University, School of social sciences<br>Ram, Harchand; Jawaharlal Nehru University, Centre for the Study of Regional Development<br>Rammohan, Anu; The University of Western Australia, Department of Economics<br>Acharya, Sanghamitra ; Jawaharlal Nehru University, Centre of Social Medicine and Community Health |
| <b>Primary Subject Heading</b>: | Obstetrics and gynaecology                                                                                                                                                                                                                                                                                                                                                                                                                                                                                                                                                                                          |
| Secondary Subject Heading:      | Public health, Health policy, Health services research, Sociology                                                                                                                                                                                                                                                                                                                                                                                                                                                                                                                                                   |
| Keywords:                       | OBSTETRICS, Quality in health care < HEALTH SERVICES ADMINISTRATION & MANAGEMENT, Health & safety < HEALTH SERVICES ADMINISTRATION & MANAGEMENT, PUBLIC HEALTH                                                                                                                                                                                                                                                                                                                                                                                                                                                      |
|                                 |                                                                                                                                                                                                                                                                                                                                                                                                                                                                                                                                                                                                                     |

SCHOLARONE™  
Manuscripts

1  
2  
3  
4  
5  
6  
7  
8  
9  
10  
11  
12  
13  
14  
15  
16  
17  
18  
19  
20  
21  
22  
23  
24  
25  
26  
27  
28  
29  
30  
31  
32  
33  
34  
35  
36  
37  
38  
39  
40  
41  
42  
43  
44  
45  
46  
47  
48  
49  
50  
51

# 1 Labor Room Violence in Uttar Pradesh, India: Evidence from Longitudinal 2 Study of Pregnancy and Childbirth

## 3 *First Author*

4 Srinivas Goli [Corresponding Author]  
5 Assistant Professor  
6 Centre for the Study of Regional Development  
7 School of Social Sciences (SSS)  
8 Jawaharlal Nehru University (JNU), Delhi-110067, India  
9 Phone: +91 7042181232  
10 Email: [sirispeaks2u@gmail.com](mailto:sirispeaks2u@gmail.com)  
11 ORCID: <http://orcid.org/0000-0002-8481-484X>

## 13 *Second Author*

14 Dibyasree Ganguly  
15 Doctoral Student, Population Studies  
16 Centre for the Study of Regional Development  
17 School of Social Sciences (SSS)  
18 Jawaharlal Nehru University (JNU), Delhi-110067, India  
19 Phone No: 91+9971435497  
20 Email: [dibyasreeganguly@gmail.com](mailto:dibyasreeganguly@gmail.com)  
21 ORCID: [orcid.org/0000-0001-5677-6316](http://orcid.org/0000-0001-5677-6316)

## 23 *Third Author*

24 Swastika Chakravorty  
25 Doctoral Student, Population Studies  
26 Centre for the Study of Regional Development  
27 School of Social Sciences (SSS)  
28 Jawaharlal Nehru University (JNU), Delhi-110067, India  
29 Phone No: 91+8447784208  
30 Email: [swa.cha1992@gmail.com](mailto:swa.cha1992@gmail.com)  
31 ORCID: [orcid.org/0000-0003-3681-9950](http://orcid.org/0000-0003-3681-9950)

## 33 *Fourth Author*

34 Mohammad Zahid Siddiqui  
35 Doctoral Student, Population Studies  
36 Centre for the Study of Regional Development  
37 School of Social Sciences (SSS)  
38 Jawaharlal Nehru University (JNU), Delhi-110067, India  
39 Phone No: 91+8800369953  
40 Email: [say2zahid.s@gmail.com](mailto:say2zahid.s@gmail.com)

## 41 *Fifth Author*

42 Harchand Ram  
43 Centre for the Study of Regional Development  
44 School of Social Sciences  
45 Jawaharlal Nehru University (JNU)  
46 New Delhi, India  
47 Mobile: (+91) 7506541092  
48 Email ID: [hm8460@gmail.com](mailto:hm8460@gmail.com)

## 50 *Sixth Author*

51 Anu Rammohan, PhD

52 Professor, Department of Economics,  
53 The University of Western Australia (M251),  
54 35 Stirling Highway, Crawley WA- 6009, Australia  
55 Phone No: 6488 5656  
56 Email: [anu.rammohan@uwa.edu.au](mailto:anu.rammohan@uwa.edu.au)

58 ***Seventh Author***

59 Sanghamitra Sheel Acharya, PhD  
60 Professor, Centre of Social Medicine and Community Health  
61 Jawaharlal Nehru University (JNU)-110067, India  
62 Phone No: 011-26704433 / 20  
63 Email: [sanghmitra.acharya@gmail.com](mailto:sanghmitra.acharya@gmail.com)

65 **Abstract**

66 **Objectives** The major objective of this study was to investigate the prevalence of labor room  
67 violence [LRV] (one of the forms of obstetric violence) faced by the women during the time  
68 of delivery in Uttar Pradesh [UP] (the largest populous state of India which is also considered  
69 to be a microcosm of India). Further, this study also analyses the association between  
70 prevalence of obstetric violence and socio-economic characteristics of the respondents.

71 **Design** The study was longitudinal in design with the first visit to women made at the time of  
72 first trimester. The second visit was made at the time of second trimester and the last visit was  
73 made after the delivery. However, we have continuously tracked women over phone to keep  
74 record of developments and adverse consequences.

75 **Settings** Urban and rural areas of UP, India.

76 **Participants** Sample of 504 pregnant women was systematically selected from the Integrated  
77 Child Development Scheme (ICDS) Register of pregnant women.

78 **Outcome** We aimed to assess the levels and determinants of LRV using data collected from  
79 504 pregnant women in a longitudinal survey conducted in UP, India. The dataset comprised  
80 of three-waves of survey from the inception of pregnancy to child-birth and postnatal-care.  
81 Logistic Regression model has been used to assess the association between prevalence of LRV  
82 faced by the women at the time of delivery and their background characteristics.

83 **Result** About 15.12% of women are facing LRV in UP, India. Results from logistic regression  
84 model (Odds Ratio [OR]) show that LRV is higher among Muslim women (OR = 1.8, 95% CI  
85 [Confidence Interval] 0.7-4.3) relative to Hindu women (OR = 1). The prevalence of LRV is  
86 higher among lower castes relative to General category, and is higher among those women who



87 have no mass media exposure (OR=4.7, 95% CI 1.7-12.8) compared to those who have  
88 (OR=1).

89 **Conclusion** In comparison with global evidence, the level of LRV in India is high. Women  
90 from socially disadvantaged communities are facing higher LRV than their counterparts.

### 91 **Ethical Approval and Consent**

92 The study was approved by expert body of Indian Council for Social Science Research. The  
93 pre-testing and instrument were duly processed through Fatima Hospital, Dr. Ram Manohar  
94 Lohia Institute of Medical Sciences and King George's Medical University. Further, written  
95 and verbal consent was taken from respondents and guardians.

96 **Keywords:** Labor room violence, women, institutional delivery, quality of health care.

97 **Word Count: 2343**

### 98 **Article Summary**

#### 99 **Strengths and limitations of this study**

- 100 • For the first time, the study measures LRV experienced by women in health facilities  
101 in India and factors associated with it.
- 102 • In comparison with global evidence, the level of LRV in India is high. Women from  
103 socially disadvantaged communities are facing higher LRV than their counterparts.
- 104 • The estimated LRV in the survey setting may be lower than actual because of under  
105 reporting due to lack of awareness about forms of obstetric violence.
- 106 • The smaller sample size prevents us from presenting LRV estimates at the greater  
107 disaggregated levels.
- 108 • However, in the absence of information on LRV in existing large scale surveys, the  
109 contribution of this study is significant.

### 115 **Introduction**

116 One of the major targets of the Sustainable Development Goals (SDGs) is to reduce maternal  
117 mortality to 70 per 100,000 live births by 2030<sup>1</sup>. Significant strides have been made in  
118 increasing life expectancy and reducing some of the common killers associated with child and  
119 maternal mortality, but working towards achieving the target of less than 70 maternal deaths

1  
2  
3 120 per 100,000 live births by 2030 would require significant improvements in the quality of  
4  
5 121 delivery care. Skilled birth attendance (SBA) has been a cornerstone of international efforts to  
6  
7 122 reduce maternal mortality and is often measured by the indicators such as institutional  
8  
9 123 deliveries or deliveries with skilled birth attendance. Recently, the United Nations Educational,  
10  
11 124 Scientific and Cultural Organisation (UNESCO), in its Universal Declaration of Bioethics and  
12  
13 125 Human Rights, declared that “health does not depend solely on scientific and technological  
14  
15 126 research developments, but also on psychosocial and cultural factors.”<sup>2</sup> Thus, a tacit effort has  
16  
17 127 been made world-wide (including in India) to encourage institutional deliveries and SBA to  
18  
19 128 ensure good quality of care during child-birth. Yet despite this, India still continues to  
20  
21 129 contribute disproportionately to the global estimates of maternal morbidity and mortality.  
22  
23 130 Globally, about 800 women die every day of preventable causes related to pregnancy and  
24  
25 131 childbirth, 20 per cent of these women are from India.<sup>3</sup> The figures for institutional deliveries  
26  
27 132 (78.9) and skilled birth attendance deliveries (81.4) in 2015-16 are also much lower than 100  
28  
29 133 percent as envisioned by SDGs. India has also failed to meet the MDG targets related to  
30  
31 134 institutional deliveries and SBA by 2015. There is increasing attention and wide recognition  
32  
33 135 that many women are deterred from facility-based delivery because the intrapartum care  
34  
35 136 provided in the facilities does not satisfy the interpersonal and emotional aspects of this  
36  
37 137 biosocial event. Others believe that the differences in quality of intrapartum care which arise  
38  
39 138 from a broader aspect social, cultural and economic discrimination and exclusion, are important  
40  
41 139 for maternal health outcomes.<sup>4-5</sup>

42  
43 140  
44  
45 141 Poor quality care includes disrespectful and abusive care, patient-blaming, purposeful neglect,  
46  
47 142 verbal or physical abuse, disregard for traditional beliefs, and the non-use of Indigenous  
48  
49 143 languages for patient communication <sup>6, 7</sup>. This type of behavior has been classified as  
50  
51 144 Obstetric/ Labour Room Violence (LRV) <sup>8</sup>. Worldwide, many women experience disrespectful  
52  
53 145 and abusive treatment during childbirth in facilities, although evidence is limited in developing  
54  
55 146 countries like India. Further, according to WHO reports “such conduct not only violates the  
56  
57 147 rights of women to respectful care, but can also threaten their rights to life, health, bodily  
58  
59 148 integrity, and freedom from discrimination”.<sup>9</sup> This statement invites greater action, dialogue,  
60  
149 research and advocacy on this important public health and human rights problem especially in  
150  
151 terms of providing respectful maternity care. According to recent recommendation suggested  
152  
153 by WHO, “Respectful maternity care – which refers to care organized for and provided to all  
154  
155 women in a manner that maintains their dignity, privacy and confidentiality, ensures freedom

1  
2  
3 153 from harm and mistreatment, and enables informed choice and continuous support during  
4 154 labour and childbirth”<sup>10</sup>.

5  
6 155

### 8 156 **LRV: Global Evidence**

9  
10 157 Prevalence of obstetric violence on women is a shockingly common phenomena for developing  
11 158 countries (>70% in Tanzania, Brazil)<sup>11,12</sup>. Increasingly, a number of studies on obstetric  
12 159 violence have focused widely on defining the term obstetric violence and the mistreatment  
13 160 associated with it. This involves determining forms of obstetric violence, measurement of  
14 161 different forms of obstetric violence, identifying challenges to maternity care, the emergent of  
15 162 laws to combat this problem and identifying systematic failures at the health system level and  
16 163 providing health facility.<sup>13-21</sup> LRV is often associated with adverse effects on pregnancy  
17 164 outcome. For instance, LRV may lead to issues such as maternal post-partum depression and  
18 165 post-traumatic stress disorders, particularly if the abuse is extreme. It is the most cited reason  
19 166 in Latin American countries for women to not return to health facilities for subsequent  
20 167 pregnancies, which consequently leads to an increase in maternal and child mortality and  
21 168 morbidities. A body of research mainly concentrated in Latin America and Europe specifically  
22 169 discusses obstetric violence, its determinants and forms.<sup>13, 22-26</sup> However, it is critical to  
23 170 generate data relating to disrespectful and abusive care practices over the pregnancy period and  
24 171 at the time of childbirth, particularly in developing countries such as India.

25  
26 172

### 27 173 **Methods**

#### 28 174 **Study design and setting**

29 175 This study is based on a unique survey conducted under the Project ‘Understanding pregnancy  
30 176 nutrition and health care among women in rural and urban slums of Uttar Pradesh: A  
31 177 longitudinal study’. Data was collected during the period June 2016 to July 2016 from a  
32 178 systematically selected sample of 504 pregnant women from the Integrated Child Development  
33 179 Scheme (ICDS) Register of pregnant women in selected villages. The study adopted a two-  
34 180 stage sampling design for both urban and rural areas. In the first stage, PSUs were selected  
35 181 from the chosen blocks in two districts of survey based on the number of pregnant women in  
36 182 the villages, where importance was given to villages with the largest number of pregnant  
37 183 women from diverse social groups. In the identified village, pregnant women were selected  
38 184 from the register, maintained by the Accredited Social Health Activist (ASHA) (the community  
39 185 health workers instituted by the Government of India’s Ministry of Health and Family Welfare  
40 186 as part of the National Rural Health Mission (NRHM) and Anganwadi workers (AWWs) -

187 appointed as functionaries to support health, education and rural development under ICDS of  
188 Ministry of Women and Child Development).

189 The sample size (n=504) is calculated using parameters such as the total number of pregnancies  
190 (n) obtained in each district through Annual Health Survey (2014) and Z values for getting the  
191 estimates representative at 95% confidence interval and design effect at 2%. The sample is self-  
192 weighted where each woman has the equal chance of getting selected. This study used the  
193 information from the first and third wave of the above-mentioned longitudinal survey. We used  
194 the socio-economic and demographic characteristics of women collected in the first wave and  
195 LRV information from the third wave which was conducted after child birth for all 504 women.

#### 196 197 Definitions

198 The definition and coding of both outcome and predictor variables are given in appendix table  
199 1.

#### 200 Data collection and analysis

201 The interview schedule comprised of structured questions in both in Hindi (local language) and  
202 English for the purpose of data collection. The respondents were asked the following question  
203 regarding labor room violence- “At the time of childbirth, have the doctor/nurse/other health  
204 workers/staff of the hospital shouted/abused/hit you?” We have used bivariate tables to analyse  
205 the prevalence of LRV with socio-economic characteristics of the respondents. Further, logistic  
206 regression models were performed to assess the association between incidence of LRV faced  
207 by women at the time of childbirth and their background characteristics, which includes place  
208 of residence, religion, caste, years of schooling of the women, age of the women, partner’s  
209 occupation, any mass media exposure and wealth quintiles. The statistical analyses have been  
210 performed in STATA-14.0 software.

#### 211 212 Patient and public involvement

213 No patients were involved in the research design, and no patients were directly involved in  
214 the study.

#### 215 216 **Results**

#### 217 **Prevalence**

218 Despite the known under-reporting of violence against women in India, about 15.12% of  
219 women reported LRV in our sample (Table 1).

**Table 1: Bivariate analysis: Prevalence and Factors associated with labour room violence.**

| Background Characteristics         | n   | LRV Prevalence (%) | 95% C.I |       | Chi-Square Value |
|------------------------------------|-----|--------------------|---------|-------|------------------|
|                                    |     |                    | LL      | UL    |                  |
| <b>Place of Residence</b>          |     |                    |         |       |                  |
| Rural                              | 344 | 15.87              | 11.29   | 21.86 | 0.3779           |
| Urban                              | 160 | 19.11              | 11.28   | 30.53 |                  |
| <b>Religion</b>                    |     |                    |         |       |                  |
| Hindu                              | 363 | 16.23              | 11.62   | 22.22 | 0.1341           |
| Islam                              | 141 | 18.18              | 10.47   | 29.70 |                  |
| <b>Caste</b>                       |     |                    |         |       |                  |
| SC/ST                              | 190 | 20.62              | 13.60   | 29.99 | 1.8627           |
| OBC                                | 227 | 15.18              | 9.58    | 23.21 |                  |
| General                            | 87  | 12.50              | 5.56    | 25.76 |                  |
| <b>Years of schooling of women</b> |     |                    |         |       |                  |
| 0                                  | 183 | 20.0               | 12.87   | 29.74 | 1.1504           |
| 1-8                                | 209 | 15.6               | 9.85    | 23.81 |                  |
| 9 and above                        | 112 | 13.79              | 6.90    | 25.67 |                  |
| <b>Age of the Women</b>            |     |                    |         |       |                  |
| Youngest - 20                      | 69  | 12.0               | 3.60    | 33.27 | 0.5610           |
| 21-29                              | 368 | 17.62              | 12.83   | 23.71 |                  |
| 30 - oldest                        | 67  | 15.38              | 6.82    | 31.12 |                  |
| <b>Partner's occupation</b>        |     |                    |         |       |                  |
| Primary/Secondary                  | 330 | 20.12              | 14.69   | 26.91 | 4.0636*          |
| Tertiary/Quaternary                | 174 | 10.23              | 5.34    | 18.71 |                  |
| <b>Any Mass Media Exposure</b>     |     |                    |         |       |                  |
| Yes                                | 330 | 12.72              | 8.49    | 18.63 | 6.1235**         |
| No                                 | 174 | 25.0               | 16.76   | 35.56 |                  |
| <b>Wealth Quintiles</b>            |     |                    |         |       |                  |
| Poor                               | 168 | 16.88              | 9.94    | 27.21 | 0.0063           |
| Middle                             | 168 | 16.84              | 10.49   | 25.93 |                  |
| Rich                               | 168 | 16.47              | 9.90    | 26.14 |                  |

Note: Significance levels  $p < 0.05^*$ ,  $p < 0.01^{**}$ ,  $p < 0.001^{***}$ ; LL: Lower Limit, UL: Upper Limit; C.I: Confidence Interval

The prevalence of LRV is more pronounced in urban areas (19%) as relative to rural (16%). Similarly, the prevalence of LRV is more among Muslim (18%) as compared to Hindu (16%) women. Further, there is significant variation in prevalence of LRV among different caste groups i.e., Scheduled Castes (SCs) (20.6 %), OBC (15.2 %) and general category (12.5 %). The educational status of the women also plays a significant role in determining the prevalence of LRV. Prevalence of LRV is higher for those women with no education (20%) compared to those women with few years of schooling. Furthermore, the variable partner's occupation also showed some variation in the prevalence of LRV. Specifically, LRV is more common among

230 women whose husband is employed in Primary/Secondary activities (20.1%) compared to  
 231 those involved in Tertiary activities (10.2 %). The wealth gradient is also important in assessing  
 232 the prevalence of LRV. The most significant predictor of LRV is mass media exposure, with  
 233 women who have some mass media exposure facing less violence (12.7%) as compared to  
 234 women who have no mass media exposure (25%).

### 235 **Correlates**

236 Logistic regression model (Table 2) shows that the variables- religion, caste, partner's  
 237 occupation and mass media exposure are statistically significant and associated with the  
 238 prevalence of LRV faced by women, after controlling for other correlates.

**Table 2: Logistic Regression estimates: Factors affecting labor room violence**

|                                    | Odds Ratio | 95% C.I |        |
|------------------------------------|------------|---------|--------|
|                                    |            | LL      | UL     |
| <b>Place of Residence</b>          |            |         |        |
| Urban                              | 1          |         |        |
| Rural                              | 1.126      | 0.464   | 2.732  |
| <b>Religion</b>                    |            |         |        |
| Hindu                              | 1          |         |        |
| Islam                              | 1.753*     | 0.722   | 4.255  |
| <b>Caste</b>                       |            |         |        |
| SC/ST                              | 1          |         |        |
| OBC                                | 0.619      | 0.262   | 1.462  |
| General                            | 0.473*     | 0.149   | 1.504  |
| <b>Years of schooling of women</b> |            |         |        |
| 0                                  | 1          |         |        |
| 1-8                                | 0.817      | 0.358   | 1.866  |
| 9 and above                        | 0.661      | 0.217   | 2.016  |
| <b>Age of the Women</b>            |            |         |        |
| Youngest - 20                      | 1          |         |        |
| 21-29                              | 1.303      | 0.345   | 4.923  |
| 30 - oldest                        | 0.970      | 0.197   | 4.782  |
| <b>Partner's occupation</b>        |            |         |        |
| Primary/Secondary                  | 1          |         |        |
| Tertiary/Quaternary                | 0.402**    | 0.169   | 0.959  |
| <b>Any Mass Media Exposure</b>     |            |         |        |
| Yes                                | 1          |         |        |
| No                                 | 4.688***   | 1.713   | 12.831 |
| <b>Wealth Quintiles</b>            |            |         |        |
| Poor                               | 1          |         |        |
| Middle                             | 0.923      | 0.356   | 2.395  |
| Rich                               | 0.654      | 0.165   | 2.598  |

239 Note: Significance levels  $p < 0.05^*$ ,  $p < 0.01^{**}$ ,  $p < 0.001^{***}$ ; LL: Lower Limit, UL: Upper Limit, C.I:  
 240 Confidence Interval

1  
2  
3 241 The odds of the occurrence of LRV is higher among Muslim women (Odds Ratio [OR] = 1.8,  
4 242 95% CI [Confidence Interval] 0.7-4.3) relative to Hindu women (OR = 1). Among social  
5 243 groups, with reference to SCs (OR = 1), the odds of occurrence of violence faced by women is  
6 244 half among General category (OR = 0.5, 95% CI 0.1-1.5) and Other Backward Class (OBC)  
7 245 (OR = 0.6, 95% CI 0.3-1.5). In terms of partner's occupation, the odds of violence is less than  
8 246 half for women those partners were engaged in Tertiary activities (OR = 0.4, 95% CI 0.2-1) in  
9 247 comparison to Primary/Secondary activities (OR = 1). The occurrence of violence for the  
10 248 women those who have no mass media exposure (OR = 4.7, 95% CI 1.7-12.8) is about five  
11 249 times higher than those who have mass media exposure (OR = 1).

## 20 250 21 251 **Discussion**

### 22 252 23 253 **Main Findings of this study**

24 254 Given the context of the WHO pledge, that every woman has the right to the highest attainable  
25 255 standard of health which also includes the right to dignified, respectful health care. This paper,  
26 256 for the first time, empirically reports the occurrence of LRV and its socioeconomic correlates  
27 257 in India. The findings are important in the Indian context where health care delivery is  
28 258 dominated by the social hierarchies, and disadvantaged communities struggle to have a place  
29 259 in the health system and receive appropriate health care with dignity. Therefore, the findings  
30 260 of this study underpin the need to explore more on the issue of LRV with more in-depth and  
31 261 large scale studies. Despite significant under-reporting of violence in India, the estimate of  
32 262 LRV in this study is high and varies according to the socio-economic characteristics of the  
33 263 female respondent. Although, caste, religion, place of residence and partner's occupation  
34 264 emerged as significant factors associated with LRV; it is the exposure to mass media which  
35 265 shows the highest disparity in the occurrence of LRV. Thus, it particularly highlights the  
36 266 importance of awareness and knowledge about reproductive rights and entitlements of women  
37 267 in the health system. This can play significant role in determining the rate of LRV.

### 38 268 39 269 **Limitations of the study**

40 270 Although the results of the survey indicate a high prevalence of LRV relative to studies from  
41 271 other developed countries<sup>13</sup>, but this study suffers from the issue of under-reporting due to lack  
42 272 of awareness about forms and nature of obstetric violence in the survey setting. Further, as with  
43 273 other micro studies, the study suffers from the short-coming of small sample size. However, in  
44 274  
45 275  
46 276  
47 277  
48 278  
49 279  
50 280  
51 281  
52 282  
53 283  
54 284  
55 285  
56 286  
57 287  
58 288  
59 289  
60 290

1  
2  
3 273 the absence of information on LRV in existing large scale surveys, the contribution of this  
4  
5 274 study is significant.

6  
7  
8 275 **What is already known on this topic**

9  
10 276 In developing countries like India where maternal and child health indicators are far from  
11  
12 277 satisfactory with poor medical and public health ethics in health care delivery system, coupled  
13  
14 278 with other barriers such as gender and social inequality, lack of accountability by the service  
15  
16 279 providers and health system inefficiencies, the high prevalence of LRV raises an important  
17  
18 280 policy question. To date the major concern for policy makers has been to increase the demand  
19  
20 281 for health care services; so less attention is paid to the supply side barriers including the quality  
21  
22 282 of health care services and related ethical standards. Due to the lack of availability of data, in-  
23  
24 283 depth studies on LRV are absent for India.

25  
26 284 In India, given the hierarchal nature of the society, it is imperative to study the access to health  
27  
28 285 facilities and women's experience of receiving health care with dignity within a socio-  
29  
30 286 economic framework. Studies based on experiences of Latin American women of Indigenous  
31  
32 287 origin insist that women from poor, indigenous or socially backward classes receive "triple  
33  
34 288 discrimination" i.e., by being female, being an ethnic minority and of lower socio-economic  
35  
36 289 status.<sup>21</sup> Even in egalitarian European societies, women facing economic hardships and  
37  
38 290 negative life events with the least social support have higher chance of experiencing LRV than  
39  
40 291 their counterparts.<sup>27, 28</sup>

41  
42  
43 292 **What this study adds**

44  
45 293 Although obstetric violence on women has received increasing global attention, developing  
46  
47 294 countries have yet to address deficiencies in this area. The Government of India has already  
48  
49 295 implemented several policies and interventions aimed towards providing adequate maternal  
50  
51 296 health care services to all. The quality of maternal health care services is one of the major  
52  
53 297 components integral to the improvement of maternal and child health, a long neglected area for  
54  
55 298 policy-makers. With the emergence of various government interventions, the number of service  
56  
57 299 providers has increased, but assuring quality and dignity in health care delivery remains a major  
58  
59 300 concern. However, contemporary studies in India<sup>29-31</sup> with regards to maternal health care are  
60  
301 mainly based on large population-level datasets focusing on availability and accessibility of  
302  
303 maternal health care services. However, there is a research gap in the assessment of quality of  
those services and evaluating the nature of treatment provided by the health care workers,



1  
2  
3 304 which is critically needed to improve public health care delivery system. Given this context,  
4  
5 305 our study fills a critical knowledge gap by providing robust quantitative evidence on LRV  
6  
7 306 experienced by pregnant women at health facilities. Issues such as LRV raise concerns not only  
8  
9 307 on medical or hospital ethical standards in India but also on the violation of the reproductive  
10  
11 308 rights of women.

## 12 13 309 **Conclusions**

14  
15 310 In comparison to global evidence, the level of LRV in India is high. Women from socially  
16  
17 311 disadvantaged communities are facing higher LRV than their counterparts. For any further  
18  
19 312 progress in pregnancy outcomes in India, policy makers should focus not only on the  
20  
21 313 availability and accessibility of services, but also on ensuring quality of care and dignity of the  
22  
23 314 receivers. Countries such as India must improve its ethical standards in health care delivery  
24  
25 315 where people from all sections of society, especially those from marginalised communities  
26  
27 316 receive quality services with dignity.

## 28 29 317 30 318 **Footnotes**

31  
32 319 **Author Contributions** SG & AR generated the idea for the survey and the paper, SG, MZS  
33  
34 320 and HR prepared an analytical plan along with conducting all data analyses. DG and SC worked  
35  
36 321 on drafting the paper. SG, DG and SC prepared the first draft of the manuscript on which AR  
37  
38 322 & SA provided critical comments after careful review.

39 323 **Funding** This study was supported by Indian Council for Social Science Research [02/185/SC  
40  
41 324 2015-16/RPR].

42  
43 325 **Competing interests** None declared

44  
45  
46 326 **Patient consent** Written and verbal consent were obtained from women and guardians  
47  
48 327 accompanying them, which explained the purpose and content of the survey and that  
49  
50 328 confidentiality of the information would be maintained.

51  
52 329 **Ethics approval** The study was approved by expert body of Indian Council for Social Science  
53  
54 330 Research. The pre-testing and instrument were duly processed through Fatima Hospital, Dr.  
55  
56 331 Ram Manohar Lohia Institute of Medical Sciences and King George's Medical University.  
57  
58 332 Further, written and verbal consent was taken from respondents and guardians.

59  
60 333 **Provenance and peer review** Not commissioned; externally peer reviewed.

334 **Data sharing statement** Data can be made available on reasonable request. For any further  
335 queries regarding data availability kindly contact Dr. Srinivas Goli, sirispeaks2u@gmail.com

## 336 **References**

- 337 1. World Health Organization. World health statistics 2016: monitoring health for the  
338 SDGs sustainable development goals. World Health Organization. 2016
- 339 2. Universal Declaration of Bioethics and Human Rights. Records of the General  
340 Conference of UNESCO; UNESCO: Paris. 2005; 3-21.  
341 <http://unesdoc.unesco.org/images/0014/001428/142825E.pdf>
- 342 3. WHO. Trends in estimates of maternal mortality ratio (MMR; maternal deaths per  
343 100,000 live births) 1990-2015. Source: WHO, UNICEF, UNFPA, World Bank Group  
344 and UNPD (MMEIG). 2015. Available at  
345 <https://data.unicef.org/topic/maternalhealth/maternal-mortality/#>
- 346 4. Kumar, S. Reducing maternal mortality in India: Policy, equity, and quality issues.  
347 Indian Journal of Public Health. 2010; 54(2), 57.
- 348 5. Munuswamy, S., Nakamura, K., Seino, K., & Kizuki, M. Inequalities in use of antenatal  
349 care and its service components in India. Journal of Rural Medicine. 2014; 9(1), 10-19.
- 350 6. Da-Silva-Carvalho, I., & Santana-Brito, R. (2017). Forms of obstetric violence  
351 experienced by mothers who had normal birth. Enfermería Global, 16(3), 89-97.
- 352 7. Savage, V., & Castro, A. (2017). Measuring mistreatment of women during childbirth:  
353 a review of terminology and methodological approaches. Reproductive health, 14(1),  
354 138.
- 355 8. Bohren MA, Vogel JP, Hunter EC, Lutsiv O, Makh SK, Souza JP, Aguiar C, Saraiva  
356 Coneglian F, Diniz ALA, Tunçalp Ö, Javadi D, Oladapo OT, Khosla R, Hindin MJ,  
357 Gülmezoglu AM. The mistreatment of women during childbirth in health facilities  
358 globally: a mixed-methods systematic review. PLoS Med. 2015;12(6)  
359 <https://doi.org/10.1371/journal.pmed.1001847>.
- 360 9. World Health Organization. (2014). WHO Statement: The prevention and elimination  
361 of disrespect and abuse during facility-based childbirth. Geneva: World Health  
362 Organization.
- 363 10. World Health Organization (2018). WHO recommendations: intrapartum care for a  
364 positive childbirth experience. Geneva: World Health Organization.

11. Sando D, Abuya T, Asefa A, Banks KP, Freedman LP, Kujawski S, et al. Methods used in prevalence studies of disrespect and abuse during facility based childbirth: lessons learned. *Reprod Health*, 2017;14:1–18.
12. Andrade P de ON, Pereira da Silva JQ, Menino Diniz CM, Costa Caminha M de F. Factors associated with obstetric abuse in vaginal birth care at a high-complexity maternity unit in Recife, Pernambuco. *Rev Bras Saude Matern Infant* [Internet]. 2016;16:29–37.
13. Diaz-Tello F. Invisible wounds: obstetric violence in the United States. *Reprod Health Matters*. 2016;24(47):56–64.
14. Savage, V., & Castro, A. Measuring mistreatment of women during childbirth: a review of terminology and methodological approaches. *Reproductive health*, 2017; 14(1), 138.
15. Da-Silva-Carvalho, I., & Santana-Brito, R. Forms of obstetric violence experienced by mothers who had normal birth. *Enfermería Global*. 2017; 16(3), 89-97.
16. Vacaflor, C. H. Obstetric violence: a new framework for identifying challenges to maternal healthcare in Argentina. *Reproductive health matters*. 2016; 24(47), 65-73.
17. Williams, C. R., Jerez, C., Klein, K., Correa, M., Belizán, J. M., & Cormick, G. Obstetric violence: A Latin American legal response to mistreatment during childbirth. *BJOG: An International Journal of Obstetrics & Gynaecology*. 2018.
18. Perera, D., Lund, R., Swahnberg, K., Schei, B., & Infanti, J. J. ‘When helpers hurt’: women’s and midwives’ stories of obstetric violence in state health institutions, Colombo district, Sri Lanka. *BMC pregnancy and childbirth*. 2018; 18(1), 211.
19. Borges, M. T. A violent birth: reframing coerced procedures during childbirth as obstetric violence. *Duke LJ*. 2017; 67, 827.
20. Oliveira, V. J., & Penna, C. M. D. M. Discussing obstetric violence through the voices of women and health professionals. *Texto & Contexto-Enfermagem*. 2017; 26(2).
21. Souza, K. J. D., Rattner, D., & Gubert, M. B. Institutional violence and quality of service in obstetrics are associated with postpartum depression. *Revista de saude publica*. 2017; 51, 69.
22. Diniz, S. G., Salgado, H. D., Andrezzo, H. F., Carvalho, P. G., Carvalho, P. C., Aguiar, C. A., & Niy, D. Y. Abuse and Disrespect In Childbirth Care As A Public Health Issue In Brazil: Origins, Definitions, Impacts On Maternal Health, And Proposals For Its Prevention *Journal of Human Growth and Development*. 2015; 25(3), 377. doi:10.7322/jhgd.106080

- 1  
2  
3 398 23. Pérez D'Gregorio, D. Obstetric violence: A new legal term introduced in Venezuela.  
4  
5 399 International Journal of Gynecology and Obstetrics. 2010; 1-2.  
6  
7 400 24. Fareira, C. Obstetric Violence within the Brazilian Healthcare System: A Critical  
8  
9 401 Analysis of the Childbirth Narratives of Tupinambá Indigenous Women from the  
10  
11 402 Olivença, Ilhéus Community. 2016.  
12 403 25. McGarry, J., Hinsliff-Smith, K., Watts, K., McCloskey, P., & Evans, C. Experiences  
13  
14 404 and impact of mistreatment and obstetric violence on women during childbearing: a  
15  
16 405 systematic review protocol. JBI database of systematic reviews and implementation  
17  
18 406 reports. 2017; 15(3), 620-627.  
19 407 26. Sadler, M., Santos, M. J., Ruiz-Berdún, D., Rojas, G. L., Skoko, E., Gillen, P., &  
20  
21 408 Clausen, J. A. Moving beyond disrespect and abuse: addressing the structural  
22  
23 409 dimensions of obstetric violence. Reproductive health matters. 2016; 24(47), 47-55.  
24 410 27. Lukasse M, Schroll AM, Karro H, Schei B, Steingrimsdottir T, Van Parys AS, et al.  
25  
26 411 Prevalence of experienced abuse in healthcare and associated obstetric characteristics  
27  
28 412 in six European countries. Acta Obstet Gynecol Scand 2015; 94:508–17.  
29 413 28. Vora KS, Mavalankar DV, Ramani KV, Upadhyaya M, Sharma B, Iyengar S, Gupta V,  
30  
31 414 Iyengar K. Maternal health situation in India: a case study. Journal of health,  
32  
33 415 population, and nutrition. 2009 Apr; 27(2):184.  
34 416 29. Ram F, Ram US, Singh AB. Future demand for maternal and child health services from  
35  
36 417 public health facilities in Uttar Pradesh. Journal of family welfare. 2010; 56.  
37  
38 418 30. Singh NK, Jha KK, Sharma RK, Verma N. Differential in antenatal care visit: a case  
39  
40 419 study of Uttar Pradesh. Indian Journal of Maternal and Child Health. 2015; 17(1):1-7.  
41 420 31. Dehury RK, Samal J. Maternal Health Situation in Bihar and Madhya Pradesh: A  
42  
43 421 Comparative Analysis of State Fact Sheets of National Family Health Survey (NFHS)-3  
44  
45 422 and 4. Journal of clinical and diagnostic research: JCDR. 2016 Sep; 10(9):IE01.  
46  
47  
48  
49  
50  
51  
52  
53  
54  
55  
56  
57  
58  
59  
60

**Appendix Table 1** Description of study variable: Definition/Coding

| Name of the variable                       | Definition/Coding                                                                                                                                                                                                                                                                                                                                                                                                                                                                                                                                                                                                                                                                                                                                                                                                                                                                                                                                                                                                                                                 |
|--------------------------------------------|-------------------------------------------------------------------------------------------------------------------------------------------------------------------------------------------------------------------------------------------------------------------------------------------------------------------------------------------------------------------------------------------------------------------------------------------------------------------------------------------------------------------------------------------------------------------------------------------------------------------------------------------------------------------------------------------------------------------------------------------------------------------------------------------------------------------------------------------------------------------------------------------------------------------------------------------------------------------------------------------------------------------------------------------------------------------|
| <i>Outcome variables</i>                   |                                                                                                                                                                                                                                                                                                                                                                                                                                                                                                                                                                                                                                                                                                                                                                                                                                                                                                                                                                                                                                                                   |
| Labor room violence                        | Labor room violence was measured as a binary variable using two categories (Yes & No) to the question asked in survey “At the time of delivery, have the doctor/nurse/other health workers/staff of the hospital shouted/abused/hit you?”:                                                                                                                                                                                                                                                                                                                                                                                                                                                                                                                                                                                                                                                                                                                                                                                                                        |
| <i>Predictor variables: Socio-economic</i> |                                                                                                                                                                                                                                                                                                                                                                                                                                                                                                                                                                                                                                                                                                                                                                                                                                                                                                                                                                                                                                                                   |
| Place of residence                         | Place of residence is recoded into Urban and Rural area.                                                                                                                                                                                                                                                                                                                                                                                                                                                                                                                                                                                                                                                                                                                                                                                                                                                                                                                                                                                                          |
| Religion                                   | The presence of other religions in Uttar Pradesh is nearly negligible which is also reflected in our sample. Therefore, we have classified our sample into Hindu and Muslim.                                                                                                                                                                                                                                                                                                                                                                                                                                                                                                                                                                                                                                                                                                                                                                                                                                                                                      |
| Caste                                      | The social groups are recoded into three groups: Scheduled Caste (SC)/Schedule Tribe (ST), Other Backward Castes (OBCs) and General Castes. A system that allows social hierarchal division of people in India.                                                                                                                                                                                                                                                                                                                                                                                                                                                                                                                                                                                                                                                                                                                                                                                                                                                   |
| Education of the Mother                    | The educational status of women is coded into three categories: No Education, 1-8 years of schooling and above secondary. These groups are classified in such a way that they have a distinct effect on the nature and level of labor room violence experienced by women.                                                                                                                                                                                                                                                                                                                                                                                                                                                                                                                                                                                                                                                                                                                                                                                         |
| Age of the Mother (in years)               | Age of the mother is categorised into three groups: less than 20 years, 21-29 years and above 30 years. This classification was done by keeping in the mind both the distribution of the sample across the ages and also considering the ideal ages of childbearing.                                                                                                                                                                                                                                                                                                                                                                                                                                                                                                                                                                                                                                                                                                                                                                                              |
| Partner’s Occupation                       | Partner’s occupation has been recoded into two broad groups: Primary/Secondary and Tertiary/Quaternary. These groups are classified in such a way that they have a distinct effect on the nature and level of labor room violence experienced by women. Activities related to primary activities include agriculture (both commercial and subsistence), forestry, mining, farming, grazing, fishing, hunting and gathering, and quarrying. It also includes packaging and processing of the raw material related to these activities. Example for secondary occupation are- textile production, metal working and smelting, automobile production, aerospace manufacturing, chemical and engineering industries, engineering, construction, shipbuilding, energy utilities, breweries and bottlers. Activities includes in this sector are- transportation and distribution, restaurants, clerical services, retail and wholesale sales, entertainment (television, movies, theater, radio, music, etc.), media, tourism, law, insurance, banking and healthcare. |
| Any mass media exposure                    | Mass media exposure is a composite variable. It is computed based on women’s exposure to print media (newspaper/magazine), and electric media (television, radio, and cinema). Exposure to any of these media sources was denoted “Yes” Otherwise “No”.                                                                                                                                                                                                                                                                                                                                                                                                                                                                                                                                                                                                                                                                                                                                                                                                           |
| Wealth Quintile                            | The wealth index is based on a variety of household characteristics and assets that are relevant for that country. The wealth index in the survey included 30 household assets. Individuals in the sample were assigned a score based on how their families rank on ownership of assets and other household characteristics using PCA. Following this, we extracted the factor weights for each variable. We then calculated wealth index scores based on these factor weights for each respondent in the national survey dataset. Finally, the population into wealth quintiles based on the wealth index scores was separated to observe the range of wealth index scores for each of the five quintiles. This was further grouped into three categories “Poor”, “Middle”, “Rich” for analysis purpose.                                                                                                                                                                                                                                                         |

# Reporting checklist for cohort study.

Based on the STROBE cohort guidelines.

## Instructions to authors

Complete this checklist by entering the page numbers from your manuscript where readers will find each of the items listed below.

Your article may not currently address all the items on the checklist. Please modify your text to include the missing information. If you are certain that an item does not apply, please write "n/a" and provide a short explanation.

Upload your completed checklist as an extra file when you submit to a journal.

In your methods section, say that you used the STROBE cohort reporting guidelines, and cite them as:

von Elm E, Altman DG, Egger M, Pocock SJ, Gøtzsche PC, Vandenbroucke JP. The Strengthening the Reporting of Observational Studies in Epidemiology (STROBE) Statement: guidelines for reporting observational studies.

|                        |                     | Reporting Item                                                                                                                  | Page Number |
|------------------------|---------------------|---------------------------------------------------------------------------------------------------------------------------------|-------------|
| Title                  | <a href="#">#1a</a> | Indicate the study's design with a commonly used term in the title or the abstract                                              | 1           |
| Abstract               | <a href="#">#1b</a> | Provide in the abstract an informative and balanced summary of what was done and what was found                                 | 2-3         |
| Background / rationale | <a href="#">#2</a>  | Explain the scientific background and rationale for the investigation being reported                                            | 3-5         |
| Objectives             | <a href="#">#3</a>  | State specific objectives, including any prespecified hypotheses                                                                | 2           |
| Study design           | <a href="#">#4</a>  | Present key elements of study design early in the paper                                                                         | 5-6         |
| Setting                | <a href="#">#5</a>  | Describe the setting, locations, and relevant dates, including periods of recruitment, exposure, follow-up, and data collection | 5-6         |
| Eligibility criteria   | <a href="#">#6a</a> | Give the eligibility criteria, and the sources and methods of                                                                   | 5-6         |

selection of participants. Describe methods of follow-up.

|    |                  |                      |                                                                 |
|----|------------------|----------------------|-----------------------------------------------------------------|
| 1  |                  |                      |                                                                 |
| 2  |                  |                      |                                                                 |
| 3  |                  | <a href="#">#6b</a>  | For matched studies, give matching criteria and number of       |
| 4  |                  |                      | exposed and unexposed                                           |
| 5  |                  |                      |                                                                 |
| 6  | Variables        | <a href="#">#7</a>   | Clearly define all outcomes, exposures, predictors, potential   |
| 7  |                  |                      | confounders, and effect modifiers. Give diagnostic criteria, if |
| 8  |                  |                      | applicable                                                      |
| 9  |                  |                      | 6 &                                                             |
| 10 |                  |                      | Appendix                                                        |
| 11 |                  |                      | table                                                           |
| 12 | Data sources /   | <a href="#">#8</a>   | For each variable of interest give sources of data and details  |
| 13 | measurement      |                      | of methods of assessment (measurement). Describe                |
| 14 |                  |                      | comparability of assessment methods if there is more than       |
| 15 |                  |                      | one group. Give information separately for exposed and          |
| 16 |                  |                      | unexposed groups if applicable.                                 |
| 17 |                  |                      |                                                                 |
| 18 |                  |                      |                                                                 |
| 19 |                  |                      |                                                                 |
| 20 | Bias             | <a href="#">#9</a>   | Describe any efforts to address potential sources of bias       |
| 21 |                  |                      |                                                                 |
| 22 | Study size       | <a href="#">#10</a>  | Explain how the study size was arrived at                       |
| 23 |                  |                      | 6                                                               |
| 24 | Quantitative     | <a href="#">#11</a>  | Explain how quantitative variables were handled in the          |
| 25 | variables        |                      | analyses. If applicable, describe which groupings were          |
| 26 |                  |                      | chosen, and why                                                 |
| 27 |                  |                      |                                                                 |
| 28 |                  |                      |                                                                 |
| 29 |                  |                      |                                                                 |
| 30 | Statistical      | <a href="#">#12a</a> | Describe all statistical methods, including those used to       |
| 31 | methods          |                      | control for confounding                                         |
| 32 |                  |                      | 6                                                               |
| 33 |                  |                      |                                                                 |
| 34 |                  | <a href="#">#12b</a> | Describe any methods used to examine subgroups and              |
| 35 |                  |                      | interactions                                                    |
| 36 |                  |                      |                                                                 |
| 37 |                  | <a href="#">#12c</a> | Explain how missing data were addressed                         |
| 38 |                  |                      |                                                                 |
| 39 |                  | <a href="#">#12d</a> | If applicable, explain how loss to follow-up was addressed      |
| 40 |                  |                      |                                                                 |
| 41 |                  | <a href="#">#12e</a> | Describe any sensitivity analyses                               |
| 42 |                  |                      |                                                                 |
| 43 |                  |                      |                                                                 |
| 44 | Participants     | <a href="#">#13a</a> | Report numbers of individuals at each stage of study—eg         |
| 45 |                  |                      | numbers potentially eligible, examined for eligibility,         |
| 46 |                  |                      | confirmed eligible, included in the study, completing follow-   |
| 47 |                  |                      | up, and analysed. Give information separately for for           |
| 48 |                  |                      | exposed and unexposed groups if applicable.                     |
| 49 |                  |                      |                                                                 |
| 50 |                  |                      |                                                                 |
| 51 |                  |                      |                                                                 |
| 52 |                  | <a href="#">#13b</a> | Give reasons for non-participation at each stage                |
| 53 |                  |                      |                                                                 |
| 54 |                  | <a href="#">#13c</a> | Consider use of a flow diagram                                  |
| 55 |                  |                      |                                                                 |
| 56 |                  |                      |                                                                 |
| 57 | Descriptive data | <a href="#">#14a</a> | Give characteristics of study participants (eg demographic,     |
| 58 |                  |                      |                                                                 |
| 59 |                  |                      |                                                                 |
| 60 |                  |                      |                                                                 |

clinical, social) and information on exposures and potential confounders. Give information separately for exposed and unexposed groups if applicable.

|    |                  |                      |                                                                   |
|----|------------------|----------------------|-------------------------------------------------------------------|
| 1  |                  |                      |                                                                   |
| 2  |                  |                      |                                                                   |
| 3  |                  |                      |                                                                   |
| 4  |                  |                      |                                                                   |
| 5  |                  |                      |                                                                   |
| 6  |                  | <a href="#">#14b</a> | Indicate number of participants with missing data for each        |
| 7  |                  |                      | variable of interest                                              |
| 8  |                  |                      |                                                                   |
| 9  |                  | <a href="#">#14c</a> | Summarise follow-up time (eg, average and total amount)           |
| 10 |                  |                      |                                                                   |
| 11 |                  |                      |                                                                   |
| 12 | Outcome data     | <a href="#">#15</a>  | Report numbers of outcome events or summary measures              |
| 13 |                  |                      | over time. Give information separately for exposed and            |
| 14 |                  |                      | unexposed groups if applicable.                                   |
| 15 |                  |                      |                                                                   |
| 16 |                  |                      |                                                                   |
| 17 | Main results     | <a href="#">#16a</a> | Give unadjusted estimates and, if applicable, confounder-         |
| 18 |                  |                      | adjusted estimates and their precision (eg, 95% confidence        |
| 19 |                  |                      | interval). Make clear which confounders were adjusted for         |
| 20 |                  |                      | and why they were included                                        |
| 21 |                  |                      |                                                                   |
| 22 |                  |                      |                                                                   |
| 23 |                  |                      |                                                                   |
| 24 |                  | <a href="#">#16b</a> | Report category boundaries when continuous variables were         |
| 25 |                  |                      | categorized                                                       |
| 26 |                  |                      |                                                                   |
| 27 |                  |                      |                                                                   |
| 28 |                  | <a href="#">#16c</a> | If relevant, consider translating estimates of relative risk into |
| 29 |                  |                      | absolute risk for a meaningful time period                        |
| 30 |                  |                      |                                                                   |
| 31 | Other analyses   | <a href="#">#17</a>  | Report other analyses done—e.g., analyses of subgroups            |
| 32 |                  |                      | and interactions, and sensitivity analyses                        |
| 33 |                  |                      |                                                                   |
| 34 |                  |                      |                                                                   |
| 35 | Key results      | <a href="#">#18</a>  | Summarise key results with reference to study objectives          |
| 36 |                  |                      | 6-9                                                               |
| 37 | Limitations      | <a href="#">#19</a>  | Discuss limitations of the study, taking into account sources     |
| 38 |                  |                      | of potential bias or imprecision. Discuss both direction and      |
| 39 |                  |                      | magnitude of any potential bias.                                  |
| 40 |                  |                      |                                                                   |
| 41 |                  |                      |                                                                   |
| 42 |                  |                      |                                                                   |
| 43 | Interpretation   | <a href="#">#20</a>  | Give a cautious overall interpretation considering objectives,    |
| 44 |                  |                      | limitations, multiplicity of analyses, results from similar       |
| 45 |                  |                      | studies, and other relevant evidence.                             |
| 46 |                  |                      |                                                                   |
| 47 |                  |                      |                                                                   |
| 48 | Generalisability | <a href="#">#21</a>  | Discuss the generalisability (external validity) of the study     |
| 49 |                  |                      | results                                                           |
| 50 |                  |                      | 10-11                                                             |
| 51 |                  |                      |                                                                   |
| 52 | Funding          | <a href="#">#22</a>  | Give the source of funding and the role of the funders for the    |
| 53 |                  |                      | present study and, if applicable, for the original study on       |
| 54 |                  |                      | which the present article is based                                |
| 55 |                  |                      | 11                                                                |
| 56 |                  |                      |                                                                   |
| 57 |                  |                      |                                                                   |
| 58 |                  |                      |                                                                   |
| 59 |                  |                      |                                                                   |
| 60 |                  |                      |                                                                   |



1 The STROBE checklist is distributed under the terms of the Creative Commons Attribution License  
2 CC-BY. This checklist can be completed online using <https://www.goodreports.org/>, a tool made by  
3 the [EQUATOR Network](#) in collaboration with [Penelope.ai](#)  
4  
5  
6  
7  
8  
9  
10  
11  
12  
13  
14  
15  
16  
17  
18  
19  
20  
21  
22  
23  
24  
25  
26  
27  
28  
29  
30  
31  
32  
33  
34  
35  
36  
37  
38  
39  
40  
41  
42  
43  
44  
45  
46  
47  
48  
49  
50  
51  
52  
53  
54  
55  
56  
57  
58  
59  
60
